# Supplementary material
Source: PubMed Central journal article supplement (PMC2932563)
Supplement: 1007424107_st01.pdf [file 1007424107_st01.pdf]

**Supplementary Table 1.** Large-scale quantitative phosphoproteomic profiling was performed on paired vehicle- and hormone-treated mTAL-enriched suspensions (n=3). A total of 654 unique phosphopeptides corresponding to 374 unique phosphoproteins were identified. The peptide sequence, phosphorylation site(s), and the corresponding protein name, gene symbol, and RefSeq Accession number are reported for each phosphopeptide identified in any one of three experimental pairs. For those 414 phosphopeptides that could be quantified in all three experimental pairs, the mean Hormone:Vehicle abundance ratio and corresponding standard error are also reported.

Peptide Sequence column: \* = phosphorylated residue

Site(s) column: ^ = ambiguously assigned phosphorylation site

Log<sub>2</sub>(H/V) Mean and SE columns: H = hormone-treated, V = vehicle-treated, n/a = peptide not observable in all 3 experimental pairs

Sig. column: \* = significantly changed Log<sub>2</sub>(H/V), p<0.05

| #  | Gene Symbol     | Protein Name                                                    | Refseq Accession | Peptide Sequence                 | Site(s)                                                      | Log <sub>2</sub> (H/V)<br>Mean | Log <sub>2</sub> (H/V)<br>SE | Sig. |
|----|-----------------|-----------------------------------------------------------------|------------------|----------------------------------|--------------------------------------------------------------|--------------------------------|------------------------------|------|
| 1  | Aak1            | AP2-associated protein kinase 1                                 | NP_001166921     | VGSLT*PPSS*PK                    | T622 <sup>^</sup> , S626 <sup>^</sup>                        |                                | 0.24                         | 0.95 |
| 2  | Abca12          | PREDICTED: ATP-binding cassette, sub-family A (ABC1), member 12 | XP_237242        | GLVQVLS*FFSQVQQQR                | S251 <sup>^</sup>                                            | 1.24                           | 2.13                         |      |
| 3  | Abcc10          | multidrug resistance-associated protein 7                       | NP_001101671     | LMT*ELLS*GIRVLK                  | T464, S468                                                   | -2.68                          | 2.48                         |      |
| 4  | Abcf1           | ATP-binding cassette sub-family F member 1                      | NP_001103353     | QLSVPAS*DEDEVPVPR                | S109                                                         | n/a                            | n/a                          |      |
| 5  | Ablim1          | actin-binding LIM protein 1                                     | NP_001037859     | PGSSIPGS*PGHTIYAK                | S51                                                          | -3.55                          | 1.81                         |      |
| 6  | Ablim1          | actin-binding LIM protein 1                                     | NP_001037859     | RSS*GREDEEELLR                   | S236                                                         | n/a                            | n/a                          |      |
| 7  | Ablim1          | actin-binding LIM protein 1                                     | NP_001037859     | S*SGREDEEELLR                    | S235 <sup>^</sup>                                            | n/a                            | n/a                          |      |
| 8  | Ablim1          | actin-binding LIM protein 1                                     | NP_001037859     | SGLHRPVST*DFAQNSYGDVSGGVR        | S318 <sup>^</sup>                                            | 1.43                           | 1.17                         |      |
| 9  | Ablim1          | actin-binding LIM protein 1                                     | NP_001037859     | SGLHRPVST*DFAQNSYGDVSGGVR        | T319 <sup>^</sup>                                            | 1.18                           | 1.24                         |      |
| 10 | Ablim1          | actin-binding LIM protein 1                                     | NP_001037859     | STS*QGSINSYVYSR                  | S136                                                         | 0.45                           | 0.09                         | *    |
| 11 | Ablim1          | actin-binding LIM protein 1                                     | NP_001037859     | T*LSPTSAEGFDQGR                  | T113 <sup>^</sup>                                            | n/a                            | n/a                          |      |
| 12 | Ablim1          | actin-binding LIM protein 1                                     | NP_001037859     | T*SSSEIYSRPGSSIPGS*PGHTIYAK      | T35 <sup>^</sup> , S51 <sup>^</sup>                          | n/a                            | n/a                          |      |
| 13 | Ablim1          | actin-binding LIM protein 1                                     | NP_001037859     | TLS*PTSAEGFDQGR                  | S115                                                         | -0.13                          | 0.13                         |      |
| 14 | Ablim1          | actin-binding LIM protein 1                                     | NP_001037859     | TS*ESIYSRPGSSIPGS*PGHTIYAK       | S37 <sup>^</sup>                                             | n/a                            | n/a                          |      |
| 15 | Ablim1          | actin-binding LIM protein 1                                     | NP_001037859     | TSSEIYSRPGSSIPGS*PGHTIYAK        | S51 <sup>^</sup>                                             | n/a                            | n/a                          |      |
| 16 | Abp10           | PREDICTED: annexin V-binding protein ABP-10                     | XP_001060944     | KLS*SQPSTDSTDKER                 | S237                                                         | -6.36                          | 3.15                         |      |
| 17 | Acin1           | apoptotic chromatin condensation inducer 1                      | NP_001163939     | GLS*PLSSTADTK                    | S479                                                         | 3.68                           | 3.76                         |      |
| 18 | Acsc2           | acetyl-coenzyme A synthetase, cytoplasmic                       | NP_001101263     | VRGWS*PPPEVR                     | S30                                                          | -0.62                          | 0.15                         |      |
| 19 | Adcy6           | adenylate cyclase type 6                                        | NP_036953        | NVEPPSPT*PAAR                    | S53                                                          | -0.95                          | 1.15                         |      |
| 20 | Adcy6           | adenylate cyclase type 6                                        | NP_036953        | NVEPPSPT*PAAR                    | T55 <sup>^</sup>                                             | -0.30                          | 1.60                         |      |
| 21 | Add1            | alpha-adducin                                                   | NP_058686        | SPPDQSAVPNT*PPS*TPVK             | T610, S613 <sup>^</sup>                                      | n/a                            | n/a                          |      |
| 22 | Add1            | alpha-adducin                                                   | NP_058686        | SPPDQSAVPNT*PPS*TPVKLEGLPQEPSR   | T610, S613 <sup>^</sup>                                      | n/a                            | n/a                          |      |
| 23 | Add1            | alpha-adducin                                                   | NP_058686        | SPPDQSAVPNT*PPS*TPVK             | T610 <sup>^</sup> , T614 <sup>^</sup>                        | n/a                            | n/a                          |      |
| 24 | Add1            | alpha-adducin                                                   | NP_058686        | SPPDQSAVPNT*PPS*TPVKLEGLPQEPSR   | T610, T614 <sup>^</sup>                                      | n/a                            | n/a                          |      |
| 25 | Add1            | alpha-adducin                                                   | NP_058686        | VVTS*PPPTTAPHK                   | S12                                                          | n/a                            | n/a                          |      |
| 26 | Add1            | alpha-adducin                                                   | NP_058686        | YSDVEVPASVTGHFSFADGDS*GTCSPLR    | S427                                                         | -0.21                          | 0.17                         |      |
| 27 | Add1            | alpha-adducin                                                   | NP_058686        | YSDVEVPASVTGHFSFADGDS*GTCSPLR    | S431                                                         | -0.93                          | 0.53                         |      |
| 28 | Add3            | gamma-adducin isoform 2                                         | NP_113740        | DRTEEVLSPDGS*PSK                 | S648                                                         | -0.73                          | 0.16                         | *‡   |
| 29 | Add3            | gamma-adducin isoform 2                                         | NP_113740        | DRTEEVLSPDGS*PSK                 | S650 <sup>^</sup>                                            | n/a                            | n/a                          |      |
| 30 | Add3            | gamma-adducin isoform 2                                         | NP_113740        | TEEVLSPDGS*PSK                   | S644 <sup>^</sup>                                            | n/a                            | n/a                          |      |
| 31 | Add3            | gamma-adducin isoform 2                                         | NP_113740        | TEEVLSPDGS*PSK                   | S648                                                         | -0.34                          | 2.45                         |      |
| 32 | Ahnak           | PREDICTED: AHNAK nucleoprotein                                  | XP_574618        | EFSA*PT*PTGTLFAGGEGK             | T2934                                                        | n/a                            | n/a                          |      |
| 33 | Ahnak           | PREDICTED: AHNAK nucleoprotein                                  | XP_574618        | FKAEALPS*PK                      | S2257                                                        | -0.67                          | 0.15                         | *‡   |
| 34 | Ahnak           | PREDICTED: AHNAK nucleoprotein isoform 1                        | XP_001078032     | KGDRS*PEPGQTWAHEVFSSR            | S94                                                          | -0.19                          | 0.10                         |      |
| 35 | Ahnak           | PREDICTED: AHNAK nucleoprotein isoform 1                        | XP_001078032     | KGDRS*PEPGQTWAHEVFSSR            | T100 <sup>^</sup>                                            | -0.42                          | 0.42                         |      |
| 36 | Ahsg            | alpha-2-HS-glycoprotein precursor                               | NP_037030        | VLHAQCHSTPDS*AEDVR               | S138                                                         | -1.00                          | 0.99                         |      |
| 37 | Ahsg            | alpha-2-HS-glycoprotein precursor                               | NP_037030        | VLHAQCHSTPDS*AEDVR               | S138                                                         | n/a                            | n/a                          |      |
| 38 | Akap12          | A-kinase anchor protein 12 isoform alpha                        | NP_476444        | S*PWSIASVTEPLEHTAGEAMPVVEVTEK    | S890 <sup>^</sup>                                            | n/a                            | n/a                          |      |
| 39 | Akap12          | A-kinase anchor protein 12 isoform alpha                        | NP_476444        | TEPASEEQEPAEDTQARLS*ADYEK        | S350 <sup>^</sup>                                            | n/a                            | n/a                          |      |
| 40 | Akap12          | A-kinase anchor protein 12 isoform alpha                        | NP_476444        | TEPASEEQEPAEDTQARLS*ADYEK        | Y353 <sup>^</sup>                                            | n/a                            | n/a                          |      |
| 41 | Akap2           | A-kinase anchor protein 2                                       | NP_001011974     | TLS*MIIEEIR                      | S730                                                         | 0.41                           | 0.32                         |      |
| 42 | Aldoa1          | aldolase A-like 1                                               | NP_001013965     | LQS*IGTENTEENR                   | S46                                                          | n/a                            | n/a                          |      |
| 43 | Aldoa1          | aldolase A-like 1                                               | NP_001013965     | KELSDIAHRIVAPKGLAIDES*TGSIK      | S36 <sup>^</sup>                                             | n/a                            | n/a                          |      |
| 44 | Ank2            | PREDICTED: ankyrin 2, neuronal                                  | XP_342338        | AS*PIVQPEEASEPK                  | S1726                                                        | n/a                            | n/a                          |      |
| 45 | Ank3            | ankyrin 3, epithelial isoform 2                                 | NP_001029156     | AEEPVS*PLTAYQK                   | S2544                                                        | -0.31                          | 0.10                         |      |
| 46 | Ank3            | ankyrin 3, epithelial isoform 2                                 | NP_001029156     | LSDGEYIS*DGEEGEDAITGDTKYLGPQDLK  | S875                                                         | n/a                            | n/a                          |      |
| 47 | Ank3            | ankyrin 3, epithelial isoform 2                                 | NP_001029156     | MNVPETMNEVLDMDS*DDEVGK           | S855                                                         | 0.43                           | 0.13                         |      |
| 48 | Ank3            | ankyrin 3, epithelial isoform 2                                 | NP_001029156     | RIT*GGLLR                        | T2465                                                        | 2.64                           | 0.45                         | *‡   |
| 49 | Ank3            | ankyrin 3, epithelial isoform 2                                 | NP_001029156     | RQS*FTSLALR                      | S1458                                                        | 0.88                           | 0.20                         | *‡   |
| 50 | Ank3            | ankyrin 3, epithelial isoform 2                                 | NP_001029156     | SFADENN*VHDPV*VQNET*PGSLES*PAQAR | S2457                                                        | -0.52                          | 0.12                         | *    |
| 51 | Ankhd1-Eif4ebp3 | PREDICTED: multiple ankyrin repeats, single KH-domain homolog   | XP_001054207     | AVITTT*S*K                       | T1619 <sup>^</sup> , T1620 <sup>^</sup> , S1621 <sup>^</sup> | n/a                            | n/a                          |      |
| 52 | Ankrd12         | ankyrin repeat domain-containing protein 12                     | NP_001101708     | S*STGEGSS*KTQHEK                 | S972 <sup>^</sup> , S979 <sup>^</sup>                        | n/a                            | n/a                          |      |
| 53 | Ankrd12         | ankyrin repeat domain-containing protein 12                     | NP_001101708     | SST*GEGSS*KTQHEK                 | T974 <sup>^</sup> , S979 <sup>^</sup>                        | n/a                            | n/a                          |      |
| 54 | Ankrd54         | ankyrin repeat domain-containing protein 54                     | NP_001020456     | S*KLNILQEGHS*OCLAEVRLVKQIHMRLR   | S217, S227                                                   | 0.57                           | 1.07                         |      |
| 55 | Ap2a2           | AP-2 complex subunit alpha-2                                    | NP_112270        | EMAEAFAGEIFKLVAGDT*MDS*VK        | T160, S163                                                   | n/a                            | n/a                          |      |
| 56 | Ap3d1           | AP-3 complex subunit delta-1                                    | NP_001094189     | NAETVKS*PEKEGVPVGEK              | S825                                                         | 1.85                           | 2.05                         |      |
| 57 | Ap3d1           | AP-3 complex subunit delta-1                                    | NP_001094189     | VDIITEEMPENALPS*DEDDKDPNDPYR     | S784                                                         | n/a                            | n/a                          |      |
| 58 | Apbb1           | amyloid beta A4 precursor protein-binding family B member 1     | NP_536726        | INGALES*VLSSS*SR                 | S569 <sup>^</sup> , S574 <sup>^</sup>                        | n/a                            | n/a                          |      |
| 59 | Apoc2           | apolipoprotein C-II                                             | NP_001078821     | AAAGELYQKTY*LTVDKLRDMY*S*K       | Y60 <sup>^</sup> , Y72 <sup>^</sup> , S73 <sup>^</sup>       | n/a                            | n/a                          |      |
| 60 | Aqp1            | aquaporin-1                                                     | NP_036910        | VWT*SGQVEEYDLADDDINSR            | T246 <sup>^</sup>                                            | 1.29                           | 0.42                         |      |
| 61 | Aqp1            | aquaporin-1                                                     | NP_036910        | VWT*SGQVEEYDLADDDINSR            | S262                                                         | 1.35                           | 0.57                         |      |
| 62 | Aqp1            | aquaporin-1                                                     | NP_036910        | VWT*SGQVEEYDLADDDINSR*RVEMKPK    | S262                                                         | -0.60                          | 1.51                         |      |
| 63 | Aqp2            | aquaporin-2                                                     | NP_037041        | RQS*VELHS*POSQSLPR               | S256, S261                                                   | 1.05                           | 1.10                         |      |
| 64 | Aqp2            | aquaporin-2                                                     | NP_037041        | RQS*VELHS*POSQSLPR               | S256, S264                                                   | 2.67                           | 2.64                         |      |
| 65 | Aqp2            | aquaporin-2                                                     | NP_037041        | RQS*VELHS*POSQSLPR               | S256                                                         | 1.60                           | 0.17                         | *‡   |
| 66 | Aqp2            | aquaporin-2                                                     | NP_037041        | RQS*VELHS*POSQSLPR               | S261 <sup>^</sup> , S264 <sup>^</sup>                        | 2.00                           | 1.98                         |      |
| 67 | Aqp2            | aquaporin-2                                                     | NP_037041        | RQS*VELHS*POSQSLPR               | S261                                                         | n/a                            | n/a                          |      |
| 68 | Aqp2            | aquaporin-2                                                     | NP_037041        | RRQS*VELHS*POSQSLPR              | S256, S261                                                   | n/a                            | n/a                          |      |
| 69 | Aqp2            | aquaporin-2                                                     | NP_037041        | RRQS*VELHS*POSQSLPR              | S256                                                         | 1.70                           | 0.24                         | *‡   |
| 70 | Arfgap2         | ADP-ribosylation factor GTPase-activating protein 2             | NP_001028879     | HGTDLWIDMNSAPSHS*PEK             | S145                                                         | n/a                            | n/a                          |      |
| 71 | Arfgef2         | brefeldin A-inhibited guanine nucleotide-exchange protein 2     | NP_851597        | ELEKPIQSKPOS*PVIQATAGS*PK        | S218, S227                                                   | -0.90                          | 0.12                         | *‡   |
| 72 | Arfgef2         | brefeldin A-inhibited guanine nucleotide-exchange protein 2     | NP_851597        | ELEKPIQSKPOS*PVIQATAGS*PK        | S227                                                         | n/a                            | n/a                          |      |
| 73 | Arhgap24        | rho GTPase-activating protein 24                                | NP_001012032     | RCS*WIDKPEPQSR                   | S283 <sup>^</sup>                                            | -0.70                          | 1.44                         |      |
| 74 | Arhgef11        | rho guanine nucleotide exchange factor 11                       | NP_076472        | S*SCTAEK                         | S509                                                         | n/a                            | n/a                          |      |
| 75 | Arhgef12        | rho guanine nucleotide exchange factor 12                       | NP_001013264     | VEHDL*SVAGLQS*PDR                | S1176 <sup>^</sup>                                           | n/a                            | n/a                          |      |

| #   | Gene Symbol | Protein Name                                                                        | Refseq Accession | Peptide Sequence                  | Site(s)            | Log <sub>2</sub> (H/V)<br>Mean | Log <sub>2</sub> (H/V)<br>SE | Sig. |
|-----|-------------|-------------------------------------------------------------------------------------|------------------|-----------------------------------|--------------------|--------------------------------|------------------------------|------|
| 76  | Arl6ip6     | ADP-ribosylation factor-like protein 6-interacting protein 6                        | NP_001019481     | IGDGS*PVLDPKR                     | S77                | 0.33                           | 0.46                         |      |
| 77  | Armc10      | armadillo repeat-containing protein 10                                              | NP_001100046     | S*AEDLTEGSDAILSAEQLEK             | S43*               | n/a                            | n/a                          |      |
| 78  | Atp1a1      | sodium/potassium-transporting ATPase subunit alpha-1 precursor                      | NP_036636        | S*PDTNENPLETR                     | S228               | 1.82                           | 1.74                         |      |
| 79  | Atp1a3      | sodium/potassium-transporting ATPase subunit alpha-3                                | NP_036638        | VDNSS*LTGESEPTQR                  | S207^              | n/a                            | n/a                          |      |
| 80  | Atn2l       | ataxin 2-like                                                                       | NP_001123569     | EVDGLLTDSPMG*PVSSK                | S347               | 0.68                           | 1.38                         |      |
| 81  | B3gnt7      | UDP-GlcNAc:betaGal beta-1,3-N-acetylglucosaminyltransferase 7                       | NP_001012134     | KKDNKYY*IPAVMYSK                  | Y279^              | 0.97                           | 2.04                         |      |
| 82  | Bad         | bcl2 antagonist of cell death                                                       | NP_073189        | RMS*DEFEGSFK                      | S156               | 0.97                           | 1.80                         |      |
| 83  | Bckdha      | 2-oxoisovalerate dehydrogenase subunit alpha, mitochondrial                         | NP_036914        | IGHHS*TSDDSSAYR                   | S338^              | n/a                            | n/a                          |      |
| 84  | Bckdha      | 2-oxoisovalerate dehydrogenase subunit alpha, mitochondrial                         | NP_036914        | IGHHS*TSDDSSAYRS*VDEVNYWDK        | S338^, S348^       | 0.47                           | 0.62                         |      |
| 85  | Bckdha      | 2-oxoisovalerate dehydrogenase subunit alpha, mitochondrial                         | NP_036914        | IGHHST*SDSSAYR                    | T339^              | n/a                            | n/a                          |      |
| 86  | Bckdha      | 2-oxoisovalerate dehydrogenase subunit alpha, mitochondrial                         | NP_036914        | IGHHSTS*DDSSAYR                   | S340               | n/a                            | n/a                          |      |
| 87  | Bckdha      | 2-oxoisovalerate dehydrogenase subunit alpha, mitochondrial                         | NP_036914        | S*VDEVNYWDK                       | S348               | 0.68                           | 0.54                         |      |
| 88  | Bckdha      | 2-oxoisovalerate dehydrogenase subunit alpha, mitochondrial                         | NP_036914        | S*VDEVNYWDKQDHPISR                | S348               | 1.88                           | 2.45                         |      |
| 89  | Bckdk       | [3-methyl-2-oxobutanoate dehydrogenase [lipoamide]] kinase, mitochondrial precursor | NP_062117        | S*TSATDTHVELAR                    | S31^               | n/a                            | n/a                          |      |
| 90  | Bckdk       | [3-methyl-2-oxobutanoate dehydrogenase [lipoamide]] kinase, mitochondrial precursor | NP_062117        | ST*SATDTHVELAR                    | T32^               | n/a                            | n/a                          |      |
| 91  | Bckdk       | [3-methyl-2-oxobutanoate dehydrogenase [lipoamide]] kinase, mitochondrial precursor | NP_062117        | STS*ATDTHVELAR                    | S33^               | n/a                            | n/a                          |      |
| 92  | Bclaf1      | bcl-2-associated transcription factor 1                                             | NP_001041317     | FHDSS*EGDDTETEDYR                 | S397               | n/a                            | n/a                          |      |
| 93  | Bclaf1      | bcl-2-associated transcription factor 1                                             | NP_001041317     | IDIS*PSALR                        | S658               | 0.50                           | 0.51                         |      |
| 94  | Bclaf1      | bcl-2-associated transcription factor 1                                             | NP_001041317     | LKELFDYS*PPLHK                    | S512^              | -0.13                          | 0.14                         |      |
| 95  | Bclaf1      | bcl-2-associated transcription factor 1                                             | NP_001041317     | RIDISPS*ALR                       | S660               | -0.73                          | 0.42                         |      |
| 96  | Bclaf1      | bcl-2-associated transcription factor 1                                             | NP_001041317     | YS*PSQNS*PIHHIPSR                 | S284, S289         | -3.55                          | 4.58                         |      |
| 97  | Bclaf1      | bcl-2-associated transcription factor 1                                             | NP_001041317     | YS*PSQNS*PIHHIPSR                 | S284^              | -0.04                          | 0.27                         |      |
| 98  | Bsnd        | barttin                                                                             | NP_620435        | LWEEAAYDQSL*LPDFTHIQMK            | S107               | -0.55                          | 0.96                         |      |
| 99  | Bsnd        | barttin                                                                             | NP_620435        | MKEETVQAGAEPEEQEEDLYGLPDS*PGDPLPK | S290               | n/a                            | n/a                          |      |
| 100 | Bsnd        | barttin                                                                             | NP_620435        | S*PPDRDEAHLQVPWASR                | S206^              | -0.20                          | 0.23                         |      |
| 101 | Bsnd        | barttin                                                                             | NP_620435        | S*PQSPDRDEAHLQVPWASR              | S202^              | -0.25                          | 0.33                         |      |
| 102 | Bsnd        | barttin                                                                             | NP_620435        | SQSS*PPACSGQSAPLASFHDDLDVGSSEGR   | S175^              | n/a                            | n/a                          |      |
| 103 | Cad         | CAD protein                                                                         | NP_001099180     | IHRAS*DPGLPAEPEK                  | S1859              | 0.40                           | 0.09                         | *    |
| 104 | Camta2      | calmodulin-binding transcription activator 2                                        | NP_001099271     | KDGY*LWKKR                        | Y121               | n/a                            | n/a                          |      |
| 105 | Canx        | calnexin precursor                                                                  | NP_742005        | AEDEILNRS*PR                      | S582               | 0.37                           | 0.66                         |      |
| 106 | Carhsp1     | calcium-regulated heat stable protein 1                                             | NP_690003        | TFS*ATVR                          | S52                | 0.37                           | 0.76                         |      |
| 107 | Carhsp1     | calcium-regulated heat stable protein 1                                             | NP_690003        | TFSAT*VR                          | T54                | 0.67                           | 1.23                         |      |
| 108 | Cbx5        | chromobox protein homolog 5                                                         | NP_001100267     | KSS*FNSASDDIK                     | S93                | 3.18                           | 2.78                         |      |
| 109 | Ccar1       | cell division cycle and apoptosis regulator protein 1                               | NP_001102005     | NLS*TMVDIHTVLKK                   | S1117^             | n/a                            | n/a                          |      |
| 110 | Cdk5rap2    | CDK5 regulatory subunit-associated protein 2                                        | NP_775157        | AVEKHYKSLPGESS*SKFHSQEQVVK        | S467^              | 1.48                           | 1.76                         |      |
| 111 | Cgnl1       | cingulin-like protein 1                                                             | NP_001101634     | EGVGEETLS*PR                      | S251               | -0.50                          | 0.82                         |      |
| 112 | Cgnl1       | cingulin-like protein 1                                                             | NP_001101634     | NCFKPCGS*QPN*PTPEDLAK             | S198, S202^        | n/a                            | n/a                          |      |
| 113 | Cgnl1       | cingulin-like protein 1                                                             | NP_001101634     | NCFKPCGS*QPN*PTPEDLAK             | S202               | 1.52                           | 1.77                         |      |
| 114 | Cgnl1       | cingulin-like protein 1                                                             | NP_001101634     | RKS*PTAPS*PQAYSETK                | S256, S261         | -0.51                          | 0.75                         |      |
| 115 | Cgnl1       | cingulin-like protein 1                                                             | NP_001101634     | RKS*PTAPS*PQAYSETK                | S256, S261         | 2.87                           | 0.56                         | *‡   |
| 116 | Cgnl1       | cingulin-like protein 1                                                             | NP_001101634     | RKS*PTAPS*PQAYSETK                | S256               | -0.40                          | 0.50                         |      |
| 117 | Cgnl1       | cingulin-like protein 1                                                             | NP_001101634     | RKS*PTAPS*PQAYSETK                | S256               | n/a                            | n/a                          |      |
| 118 | Cgnl1       | cingulin-like protein 1                                                             | NP_001101634     | RKSPT*APS*PQAYSETK                | T258, S261         | 3.19                           | 0.74                         | *‡   |
| 119 | Cgnl1       | cingulin-like protein 1                                                             | NP_001101634     | RKSPT*APS*PQAYSETK                | T258^              | 2.46                           | 2.30                         |      |
| 120 | Cgnl1       | cingulin-like protein 1                                                             | NP_001101634     | RQDS*AGPILDGAR                    | S283               | 1.15                           | 1.28                         |      |
| 121 | Cgnl1       | cingulin-like protein 1                                                             | NP_001101634     | S*PTAPS*PQAYSETK                  | S256^              | n/a                            | n/a                          |      |
| 122 | Cgnl1       | cingulin-like protein 1                                                             | NP_001101634     | S*SEHLRPSQVFLQR                   | S413^              | -0.07                          | 0.11                         |      |
| 123 | Cgnl1       | cingulin-like protein 1                                                             | NP_001101634     | SRS*VDSAFPGLQGNTEYLTEFSR          | S387^              | -3.95                          | 3.29                         |      |
| 124 | Cgnl1       | cingulin-like protein 1                                                             | NP_001101634     | SS*EHLRPSQVFLQR                   | S414               | -0.08                          | 0.11                         |      |
| 125 | Clasp2      | CLIP-associating protein 2                                                          | NP_446174        | GRSRTKMVS*QSQPSGR                 | S459, S465         | n/a                            | n/a                          |      |
| 126 | Cldn10      | claudin 10                                                                          | NP_001099528     | MGYTYNGPTS*VMSSR                  | S256               | n/a                            | n/a                          |      |
| 127 | Clmn        | calmin                                                                              | NP_001100225     | SHSEGLDFKPS*PPLSK                 | S722               | -0.28                          | 0.14                         |      |
| 128 | Clmn        | calmin                                                                              | NP_001100225     | SHSEGLDFKPS*PPLSK                 | S726^              | -0.38                          | 0.23                         |      |
| 129 | Clmn        | calmin                                                                              | NP_001100225     | VFVCDQLES*PTGFSLGAPSHK            | S358               | n/a                            | n/a                          |      |
| 130 | Cobl1       | Cobl-like 1                                                                         | NP_001101203     | ASPES*PSESSAQPPAIIQDGK            | S115               | 1.64                           | 1.73                         |      |
| 131 | Cobl1       | Cobl-like 1                                                                         | NP_001101203     | ASPESPS*EDSSAQPPAIIQDGK           | S117^              | n/a                            | n/a                          |      |
| 132 | Cobl1       | Cobl-like 1                                                                         | NP_001101203     | QSS*LNFGSSDPEHIR                  | S180               | -0.14                          | 0.03                         |      |
| 133 | Comt        | catechol O-methyltransferase                                                        | NP_036663        | AIYQGPSS*PKDS                     | S260^              | n/a                            | n/a                          |      |
| 134 | Coq9        | ubiquinone biosynthesis protein COQ9, mitochondrial precursor                       | NP_001030334     | YTDQS*GEEEDYESEEQIQHR             | S80                | n/a                            | n/a                          |      |
| 135 | Cpeb1       | cytoplasmic polyadenylation element-binding protein 1                               | NP_001099746     | SY*LKAVT*AAFVEIKTKFTK             | Y483^, T488^       | n/a                            | n/a                          |      |
| 136 | Ctdsp2      | CTD small phosphatase-like protein 2                                                | NP_001014070     | KYS*EVDDSLPSGGEKPSK               | S28^               | 1.16                           | 0.83                         |      |
| 137 | Ctnna1      | catenin alpha-1                                                                     | NP_001007146     | TPEELDD*DFETEDFDVR                | S643               | n/a                            | n/a                          |      |
| 138 | Ctnna1      | catenin alpha-1                                                                     | NP_001007146     | SRTS*VQTEDDQLIAGQSAR              | S657               | n/a                            | n/a                          |      |
| 139 | Ctnnb1      | catenin beta-1                                                                      | NP_445809        | RLS*VELTSLFR                      | S675               | -0.38                          | 0.81                         |      |
| 140 | Ctnnb1      | catenin beta-1                                                                      | NP_445809        | RTS*MGTTQQQFVEGVR                 | S552               | 2.15                           | 0.15                         | *‡   |
| 141 | Ctnnb1      | catenin beta-1                                                                      | NP_445809        | T*SMGGTQQQFVEGVR                  | T551^              | 2.04                           | 0.46                         | *‡   |
| 142 | Ctnnb1      | catenin beta-1                                                                      | NP_445809        | TS*MGTTQQQFVEGVR                  | S552^              | 2.04                           | 0.46                         | *‡   |
| 143 | Ctnnd1      | catenin delta-1                                                                     | NP_001101210     | LRS*YEDMIGEVPDDQYYWAPLAQHR        | S320               | 0.47                           | 0.43                         |      |
| 144 | Ctnnd1      | catenin delta-1                                                                     | NP_001101210     | S*MGYDLDLYGMMSDYGTAR              | S288^              | n/a                            | n/a                          |      |
| 145 | Ctnnd1      | catenin delta-1                                                                     | NP_001101210     | S*RDQVYGPQVQR                     | S252^              | -2.47                          | 0.95                         |      |
| 146 | Ctnnd1      | catenin delta-1                                                                     | NP_001101210     | VGSS*SVDLHR                       | S268               | 2.14                           | 2.79                         |      |
| 147 | Ctnn        | cortactin isoform B                                                                 | NP_068640        | KQT*PPAS*PSPQPAEDRPPS*SPIYEDAAPLK | T364, S368^, S380^ | n/a                            | n/a                          |      |
| 148 | Ctnn        | cortactin isoform B                                                                 | NP_068640        | KQT*PPAS*PSPQPAEDRPPS*PIYEDAAPLK  | T364, S368, Y384^  | n/a                            | n/a                          |      |
| 149 | Ctnn        | cortactin isoform B                                                                 | NP_068640        | KQT*PPAS*PSPQPAEDRPPS*SPIYEDAAPLK | T364^, S380^       | n/a                            | n/a                          |      |
| 150 | Ctnn        | cortactin isoform B                                                                 | NP_068640        | KQT*PPAS*PSPQPAEDRPPS*PIYEDAAPLK  | T364, Y384^        | n/a                            | n/a                          |      |
| 151 | Cul1        | culin-1                                                                             | NP_001102097     | LIEKERNGETINT*R                   | T198^              | 0.46                           | 0.10                         | *    |
| 152 | Cyba        | cytochrome b-245 light chain                                                        | NP_077074        | KKPS*EAEAEAASAGPQVNPPIVTDEVV      | S168               | 1.34                           | 0.26                         | *‡   |
| 153 | Cys1        | cystin 1                                                                            | NP_001103067     | TAAVQEECGDPRPAT*PPGGR             | T55                | 1.51                           | 2.15                         |      |

| #   | Gene Symbol | Protein Name                                                                                                     | Refseq Accession | Peptide Sequence                      | Site(s)                | Log <sub>2</sub> (H/V)<br>Mean | Log <sub>2</sub> (H/V)<br>SE | Sig. |
|-----|-------------|------------------------------------------------------------------------------------------------------------------|------------------|---------------------------------------|------------------------|--------------------------------|------------------------------|------|
| 154 | Cys1        | cystin 1                                                                                                         | NP_001103067     | VTGNPEDESCASEAPGSS*PK                 | S116                   | -1.62                          | 2.33                         |      |
| 155 | Dap         | death-associated protein 1                                                                                       | NP_071971        | DKDDQEWESTS*PPKPTVYISGVIAIR           | S51^A                  | -0.49                          | 0.50                         |      |
| 156 | Dbln        | drebrin-like protein                                                                                             | NP_112642        | LRS*PFLQK                             | S288                   | -0.53                          | 0.11                         | *    |
| 157 | Ddi2        | protein DD11 homolog 2                                                                                           | NP_001029321     | TQALLS*PGER                           | S121                   | 5.15                           | 5.04                         |      |
| 158 | Disc1       | disrupted in schizophrenia 1 homolog                                                                             | NP_783186        | LLALSS*RNTRRLGS*VK                    | S623^A, S631^A         | -0.77                          | 0.17                         | *‡   |
| 159 | Dixdc1      | dixin                                                                                                            | NP_001032743     | QAY*VAWVNAQLKK                        | Y31                    | n/a                            | n/a                          |      |
| 160 | Dnajc5      | dnaJ homolog subfamily C member 5                                                                                | NP_077075        | SLS*TSGESLYHVLGLDK                    | S10                    | 0.77                           | 0.39                         |      |
| 161 | Dnm1l       | dynamain-1-like protein                                                                                          | NP_446107        | SKPIPIPAS*PQK                         | S596                   | -0.33                          | 0.74                         |      |
| 162 | Dock8       | dedicator of cytokinesis 8                                                                                       | NP_001032882     | VMSS*NPDLAGTHCAADEEVK                 | S904^A                 | n/a                            | n/a                          |      |
| 163 | Dtnb        | dystrobrevin beta                                                                                                | NP_001012191     | VLDS*PSRLDEEHR                        | S394                   | n/a                            | n/a                          |      |
| 164 | Dync1h1     | cytoplasmic dynein 1 heavy chain 1                                                                               | NP_062099        | TDSTS*DGPRPAAWMR                      | S4368^A                | -0.20                          | 0.18                         |      |
| 165 | Dync1l1     | cytoplasmic dynein 1 light intermediate chain 1                                                                  | NP_665715        | DFQEYVEGEDFPAS*PQR                    | S207                   | n/a                            | n/a                          |      |
| 166 | Dync1l1     | cytoplasmic dynein 1 light intermediate chain 1                                                                  | NP_665715        | KPASV*SPTTPTS*PTEGEAS                 | S510, S516^A           | n/a                            | n/a                          |      |
| 167 | Dync1l1     | cytoplasmic dynein 1 light intermediate chain 1                                                                  | NP_665715        | KPASV*SPTTPTS*PTEGEAS                 | S516                   | n/a                            | n/a                          |      |
| 168 | Dync1l1     | cytoplasmic dynein 1 light intermediate chain 1<br>dual specificity tyrosine-phosphorylation-regulated kinase 1B | NP_665715        | KPASV*SPTTPTS*PTEGEAS                 | T518^A                 | n/a                            | n/a                          |      |
| 169 | Dyrk1b      | kinase 1B                                                                                                        | NP_001100966     | IYQY*IQSR                             | Y273                   | 0.58                           | 0.99                         |      |
| 170 | Edc4        | enhancer of mRNA-decapping protein 4                                                                             | NP_001028240     | TRS*PDVISSASTALSQDPIEIAEALSR          | S734^A                 | 4.68                           | 5.16                         |      |
| 171 | Eef1d       | elongation factor 1-delta                                                                                        | NP_001013122     | GATPAEDDEDNDILFGS*DEEEDKEAAR          | S531                   | n/a                            | n/a                          |      |
| 172 | Egf         | pro-epidermal growth factor precursor                                                                            | NP_036974        | KDDQLAGDNADLS*KEVASLDSNPK             | S799                   | -0.23                          | 0.14                         |      |
| 173 | Ehbp1f1     | EH domain-binding protein 1-like protein 1 isoform 1                                                             | NP_001020288     | LKPKS*VKVVAELSL*TLTS*GVLLREGR         | S141^A, S150^A, S154^A | 0.97                           | 0.98                         |      |
| 174 | Eif3b       | eukaryotic translation initiation factor 3 subunit B                                                             | NP_001026810     | AKPAAQSEETAA*PAAS*PTPQSAQEPSAPGK      | S75, S79               | n/a                            | n/a                          |      |
| 175 | Eif3b       | eukaryotic translation initiation factor 3 subunit B                                                             | NP_001026810     | AKPAAQSEETAA*PAAS*PTPQSAQEPSAPGK      | S75^A, T81^A           | n/a                            | n/a                          |      |
| 176 | Eif3c       | eukaryotic translation initiation factor 3 subunit C                                                             | NP_001094132     | LLLS*EDEEDTKR                         | S39^A                  | -0.22                          | 0.38                         |      |
| 177 | Eif4b       | eukaryotic translation initiation factor 4B                                                                      | NP_001008325     | SLENELNKEDCHS*PTSCKPKPDQPLK           | S459                   | -1.35                          | 0.07                         | *‡   |
| 178 | Eif4g2      | eukaryotic translation initiation factor 4 gamma, 2                                                              | NP_001017374     | FDKLCLELLNVGES*K                      | S107                   | 1.23                           | 2.18                         |      |
| 179 | Eif5b       | eukaryotic translation initiation factor 5B                                                                      | NP_001103611     | SVPTIDS*GNEDDSSFK                     | S215                   | n/a                            | n/a                          |      |
| 180 | Epb4.1      | PREDICTED: erythrocyte membrane protein band 4.1                                                                 | XP_232771        | RLS*THSPFR                            | S890^A                 | 0.96                           | 1.09                         |      |
| 181 | Epb4.1f1    | band 4.1-like protein 1 isoform L                                                                                | NP_067713        | SLDGAEFSPAS*VSENHADAGPDGDKR           | S441                   | -0.15                          | 0.57                         |      |
| 182 | Epb4.9      | dematin                                                                                                          | NP_001101855     | DSSVPGS*PSNIVAK                       | S26                    | 2.60                           | 2.42                         |      |
| 183 | Epb4.9      | dematin                                                                                                          | NP_001101855     | DSSVPGSPS*NIVAK                       | S28                    | 1.81                           | 1.64                         |      |
| 184 | Epb4.9      | dematin                                                                                                          | NP_001101855     | STS*PPPS*PEVWAEER                     | S92, S96               | n/a                            | n/a                          |      |
| 185 | Epn3        | epsin-3                                                                                                          | NP_001019962     | TPVLPSPGPIIDPWAPSSPT*PK               | T361                   | 1.45                           | 1.46                         |      |
| 186 | Eps15l1     | epidermal growth factor receptor substrate 15-like 1                                                             | NP_001025092     | STPSHGVSSSLNLTGSL*PK                  | S255                   | n/a                            | n/a                          |      |
| 187 | Eps8l2      | epidermal growth factor receptor kinase substrate 8-like protein 2                                               | NP_001101978     | HS*LSSEPOQVEDVAPPGSSPHANR             | S421^A                 | n/a                            | n/a                          |      |
| 188 | Eps8l2      | epidermal growth factor receptor kinase substrate 8-like protein 2                                               | NP_001101978     | HSL*SEPOQVEDVAPPGSSPHANR              | S423^A                 | n/a                            | n/a                          |      |
| 189 | Eps8l2      | epidermal growth factor receptor kinase substrate 8-like protein 2                                               | NP_001101978     | HSL*SEPOQVEDVAPPGSS*PHANR             | S437                   | n/a                            | n/a                          |      |
| 190 | Eps8l2      | epidermal growth factor receptor kinase substrate 8-like protein 2                                               | NP_001101978     | HSL*SEPOQVEDVAPPGSS*PHANR             | S438                   | -0.19                          | 0.10                         |      |
| 191 | Eps8l2      | epidermal growth factor receptor kinase substrate 8-like protein 2                                               | NP_001101978     | RAEDYSNVHTS*PEAEGAPHL                 | S675                   | n/a                            | n/a                          |      |
| 192 | Eps8l2      | epidermal growth factor receptor kinase substrate 8-like protein 2                                               | NP_001101978     | YWGPAS*PTHK                           | S528                   | 0.82                           | 1.32                         |      |
| 193 | Eps8l2      | epidermal growth factor receptor kinase substrate 8-like protein 2                                               | NP_001101978     | YWGPASPT*HK                           | T530^A                 | -0.83                          | 0.47                         |      |
| 194 | ErbB2       | receptor tyrosine-protein kinase erbB-2                                                                          | NP_058699        | RHRSS*TR                              | S1055                  | n/a                            | n/a                          |      |
| 195 | Esam        | endothelial cell-selective adhesion molecule precursor                                                           | NP_001004245     | AAPRRPGTFTPTPSVQALS*SPR               | S347^A                 | -2.99                          | 1.81                         |      |
| 196 | Esam        | endothelial cell-selective adhesion molecule precursor                                                           | NP_001004245     | AAPRRPGTFTPTPSVQALS*PR                | S348                   | -1.08                          | 0.20                         | *‡   |
| 197 | Exosc2      | exosome complex exonuclease RRP4                                                                                 | NP_001102422     | Y*KLGQAGALVQVSPALVK                   | Y163                   | -0.99                          | 1.34                         |      |
| 198 | Fam129b     | niban-like protein 1                                                                                             | NP_001103355     | TVLEAS*PPAS*PLR                       | S693, S697             | 0.84                           | 0.48                         |      |
| 199 | Fam169a     | PREDICTED: family with sequence similarity 169, member A                                                         | XP_226706        | TILGS*SDNVATLSNEEK                    | S522                   | 0.17                           | 0.43                         |      |
| 200 | Fam21c      | WASH complex subunit FAM21                                                                                       | NP_954677        | GQPAQGPVSEES*PPSPKPKG                 | S384^A                 | 0.00                           | 0.55                         |      |
| 201 | Fam21c      | WASH complex subunit FAM21                                                                                       | NP_954677        | TS*PDSEQPPASEPWVERPWSVEEIR            | S5^A                   | n/a                            | n/a                          |      |
| 202 | Fam54b      | hypothetical protein LOC298549                                                                                   | NP_001013957     | AS*FETLNPDLCLK                        | S38                    | 4.83                           | 0.60                         | *‡   |
| 203 | Fam54b      | hypothetical protein LOC298549                                                                                   | NP_001013957     | ASS*FADMMGLK                          | S235                   | 0.52                           | 0.47                         |      |
| 204 | Fam54b      | hypothetical protein LOC298549                                                                                   | NP_001013957     | NAS*VFNLR                             | S100                   | 1.54                           | 1.59                         |      |
| 205 | Fam82a2     | regulator of microtubule dynamics protein 3                                                                      | NP_001014068     | S*QSLPNSLDYAQTSEER                    | S44                    | 1.18                           | 0.06                         | *‡   |
| 206 | Fam82a2     | regulator of microtubule dynamics protein 3                                                                      | NP_001014068     | SQS*LPNSLDY*YAQTSEER                  | S46^A                  | 1.18                           | 0.06                         |      |
| 207 | Farp1       | FERM, RhoGEF and pleckstrin domain-containing protein 1                                                          | NP_001100757     | LGAPENSGIS*TLER                       | S23                    | 3.12                           | 3.08                         |      |
| 208 | Farp1       | FERM, RhoGEF and pleckstrin domain-containing protein 1                                                          | NP_001100757     | LGAPENSGIS*TLER                       | T24                    | 3.11                           | 3.08                         |      |
| 209 | Farp1       | FERM, RhoGEF and pleckstrin domain-containing protein 1                                                          | NP_001100757     | SPDEATAADQES*EDDLASAR                 | S893                   | n/a                            | n/a                          |      |
| 210 | Fcho2       | PREDICTED: Fcho2 isoform 2                                                                                       | XP_219503        | LSGNEIPRPF*PPITSNTS*PPPTAPLAR         | S533, S541^A           | n/a                            | n/a                          |      |
| 211 | Fkbp15      | PREDICTED: FK506 binding protein 15                                                                              | XP_342847        | RLS*LTPDPEKK                          | S1094^A                | 2.24                           | 2.50                         |      |
| 212 | Fkbp2       | peptidyl-prolyl cis-trans isomerase FKBP2                                                                        | NP_001127900     | VDCPIKS*R                             | S44                    | n/a                            | n/a                          |      |
| 213 | Fkbp8       | peptidyl-prolyl cis-trans isomerase FKBP8                                                                        | NP_001032257     | LEPS*NKTHIAELSKLVK                    | S329                   | n/a                            | n/a                          |      |
| 214 | Flna        | filamin-A                                                                                                        | NP_001128071     | RAPS*VANVGSCHDSLK                     | S2144                  | 0.27                           | 0.16                         |      |
| 215 | Fnbp1l      | formin-binding protein 1-like                                                                                    | NP_001034698     | RHS*SDINHLV*YQGR                      | S488                   | 1.75                           | 0.45                         |      |
| 216 | Foxp1       | forkhead box protein P1                                                                                          | NP_001029303     | ERLQAMMT*HLHV*STEPKAAPOPLNLV*SV*VTLSK | T401, S421, S422^A     | 0.67                           | 1.03                         |      |
| 217 | G3bp1       | GTPase activating protein (SH3 domain) binding protein 1                                                         | NP_598249        | SAS*PAPADVAPAQEDLR                    | S231                   | 0.17                           | 0.27                         |      |
| 218 | G3bp1       | GTPase activating protein (SH3 domain) binding protein 1                                                         | NP_598249        | YQDEVFGVFTPEQEE*EEEEVEEPEER           | S149^A                 | n/a                            | n/a                          |      |
| 219 | Gbf1        | PREDICTED: golgi-specific brefeldin A-resistance factor 1                                                        | XP_219953        | ADAPDAGAQSDS*ELPSYHQNDVSLDR           | S1301^A                | n/a                            | n/a                          |      |
| 220 | Gck         | glucokinase                                                                                                      | NP_036697        | VMLVKVGEAGQW*VKTK                     | S100^A                 | -0.57                          | 0.11                         | *    |
| 221 | Gck         | glucokinase                                                                                                      | NP_036697        | VMLVKVGEAGQW*VKTK                     | T103^A                 | -0.57                          | 0.12                         | *    |
| 222 | Gng12       | PREDICTED: guanine nucleotide binding protein (G protein), gamma 12                                              | XP_001067408     | ASADLMS*YCEEHARSPLLMGIPTSENPFK        | S41^A                  | 0.38                           | 0.24                         |      |

| #   | Gene Symbol | Protein Name                                                        | Refseq Accession | Peptide Sequence                     | Site(s)              | Log <sub>2</sub> (HV)<br>Mean | Log <sub>2</sub> (HV)<br>SE | Sig. |
|-----|-------------|---------------------------------------------------------------------|------------------|--------------------------------------|----------------------|-------------------------------|-----------------------------|------|
| 223 | Gng12       | PREDICTED: guanine nucleotide binding protein (G protein), gamma 12 | XP_001067408     | S'DPLLMGIPTSENPFK                    | S49                  | 0.63                          | 0.14                        | *‡   |
| 224 | Golga5      | golgin subfamily A member 5                                         | NP_001028237     | KKS*EPDDELLFDLNSQK                   | S116                 | 1.25                          | 1.15                        |      |
| 225 | Golgb1      | Golgin subfamily B member 1                                         | NP_620240        | DQHGLEAGLNDTGMELNS*PQPDGVDK          | S614                 | 0.64                          | 0.05                        | *‡   |
| 226 | Grif1       | PREDICTED: glucocorticoid receptor DNA-binding factor 1             | XP_001053554     | KVS*AVSKPVLRY                        | S1046                | 0.22                          | 0.18                        |      |
| 227 | Gsk3a       | glycogen synthase kinase-3 alpha                                    | NP_059040        | GEPNVS*YICSR                         | S278^                | -1.61                         | 1.94                        |      |
| 228 | Gsk3a       | glycogen synthase kinase-3 alpha                                    | NP_059040        | GEPNVS*YICSR                         | Y279                 | 0.12                          | 0.44                        |      |
| 229 | H3f3b       | histone H3.3                                                        | NP_446437        | FQS*AAIGALQEASEAIVLVGLFEDTNLCIAHAK   | S87^                 | 1.39                          | 2.99                        |      |
| 230 | Hdac2       | histone deacetylase 2                                               | NP_445899        | MLPHAPGVQMAIPEDAVHEDS*GDEDGEDPDKR    | S394                 | 3.95                          | 4.21                        |      |
| 231 | HdGF        | hepatoma-derived growth factor                                      | NP_446159        | AGDMLEDSP*PKRPK                      | S165                 | -0.27                         | 0.28                        |      |
| 232 | HdGF        | hepatoma-derived growth factor                                      | NP_446159        | S*CAEEPEVEPEAHEGDGDK                 | S107                 | n/a                           | n/a                         |      |
| 233 | Hist1h1d    | histone H1.2                                                        | NP_579819        | KAS*GPPVSELITK                       | S36                  | -0.04                         | 0.02                        |      |
| 234 | Hist1h1d    | histone H1.2                                                        | NP_579819        | RKAS*GPPVSELITK                      | S36                  | 0.35                          | 0.75                        |      |
| 235 | Hist1h1d    | histone H1.2                                                        | NP_579819        | S*GPPVSELITK                         | S36^                 | 0.26                          | 0.54                        |      |
| 236 | Hist1h2ail  | histone H3.1                                                        | NP_001013074     | FQSSAVMALQEAACEAY*LVGLFEDTNLCIAHAK   | Y100                 | 0.98                          | 2.19                        |      |
| 237 | Hist1h4b    | histone H4                                                          | NP_073177        | RIS*GLIYEETR                         | S48                  | -0.34                         | 0.07                        | *    |
| 238 | Hmgn1       | high-mobility group nucleosome binding domain 1                     | NP_001013202     | QAEVADQQTDLPAENGETENQSPAS*EEEK       | S87^                 | n/a                           | n/a                         |      |
| 239 | Hn1         | hematological and neurological expressed 1 protein                  | NP_001005876     | S*NSSAEASSGDFLDLK                    | S80^                 | 0.42                          | 0.25                        |      |
| 240 | Hn1fa       | hepatocyte nuclear factor 1-alpha                                   | NP_036801        | MVS*KLS*QLQTELLAALLES*GLS*K          | S3^, S6^, S19^, S22^ | 1.57                          | 1.64                        |      |
| 241 | Hnrnpa1     | heterogeneous nuclear ribonucleoprotein A1                          | NP_058944        | SES*PKPEQLRK                         | S6                   | n/a                           | n/a                         |      |
| 242 | Hnrnpa1     | heterogeneous nuclear ribonucleoprotein A1                          | NP_058944        | SES*PKPEQLRK                         | S6                   | n/a                           | n/a                         |      |
| 243 | Hnrnpa3     | heterogeneous nuclear ribonucleoprotein A3 isoform a                | NP_937765        | SSGS*PYGGYGSGGGSGGGYGSR              | S359                 | -0.50                         | 0.25                        |      |
| 244 | Hnrnpa3     | heterogeneous nuclear ribonucleoprotein A3 isoform a                | NP_937765        | SSGSPY*GGYGSGGGSGGGYGSR              | Y361                 | n/a                           | n/a                         |      |
| 245 | Hnrnpa3     | heterogeneous nuclear ribonucleoprotein A3 isoform a                | NP_937765        | SSGSPYGGYG*GSGGGSGGGYGSR             | Y365                 | -0.72                         | 1.00                        |      |
| 246 | Hnrmpc      | heterogeneous nuclear ribonucleoprotein C                           | NP_001020804     | GDDQLELKDDKEPEEGEDDRDS*ANGEDDS       | S291                 | n/a                           | n/a                         |      |
| 247 | Hnrmpk      | heterogeneous nuclear ribonucleoprotein K                           | NP_476482        | SG*YDGLGPITTVQTIK                    | S379                 | 1.22                          | 0.81                        |      |
| 248 | Hnrmpk      | heterogeneous nuclear ribonucleoprotein K                           | NP_476482        | IIPTEELGQLPS*PTATSQLPLESDAVECLNYQHYK | S116                 | n/a                           | n/a                         |      |
| 249 | Hnrmpu      | heterogeneous nuclear ribonucleoprotein U                           | NP_476480        | AKS*PQPVVEEEDHFDDTVCLDYNCDLHFK       | S245                 | -0.34                         | 0.42                        |      |
| 250 | Hnrph1      | heterogeneous nuclear ribonucleoprotein H                           | NP_543172        | HTGPN*PDANDGFVR                      | S27                  | 0.51                          | 0.60                        |      |
| 251 | Hnrph1      | heterogeneous nuclear ribonucleoprotein H                           | NP_543172        | HTGPN*PD*ANDGFVR                     | T30                  | -0.43                         | 0.29                        |      |
| 252 | Hsd11b2     | corticosteroid 11-beta-dehydrogenase isozyme 2                      | NP_058777        | ALRPGQPGVHDTQDPNPS*PTVSAL            | S394                 | 0.46                          | 0.98                        |      |
| 253 | Hsp90aa1    | heat shock protein HSP 90-alpha                                     | NP_786937        | ESDDKPEIEDVGS*DEEEEEK                | S263                 | n/a                           | n/a                         |      |
| 254 | Hsp90aa1    | heat shock protein HSP 90-alpha                                     | NP_786937        | ESDDKPEIEDVGS*DEEEEEK                | S263                 | n/a                           | n/a                         |      |
| 255 | Hsp90aa1    | heat shock protein HSP 90-alpha                                     | NP_786937        | ESDDKPEIEDVGS*DEEEEEKDGDK            | S263                 | n/a                           | n/a                         |      |
| 256 | Hsp90ab1    | heat shock protein HSP 90-beta                                      | NP_001004082     | IEDVGS*DEEDDSGK                      | S255                 | n/a                           | n/a                         |      |
| 257 | Hsp90ab1    | heat shock protein HSP 90-beta                                      | NP_001004082     | IEDVGS*DEEDDSGKDK                    | S255                 | n/a                           | n/a                         |      |
| 258 | Hsp90ab1    | heat shock protein HSP 90-beta                                      | NP_001004082     | IEDVGS*DEEDDSGKDKDK                  | S255                 | n/a                           | n/a                         |      |
| 259 | Hspa4       | heat shock 70 kDa protein 4                                         | NP_705893        | MQVDQEEPTHEEQPQT*PAENK               | T538                 | 0.97                          | 0.44                        |      |
| 260 | Hspa9       | stress-70 protein, mitochondrial                                    | NP_001094128     | EAAEKAKCELSVQ*DNLPYLTMDASGPK         | T325^                | 0.00                          | 0.45                        |      |
| 261 | Hspb1       | heat shock protein beta-1                                           | NP_114176        | QLS*SGVSEIR                          | S85                  | 1.37                          | 1.57                        |      |
| 262 | Hspc159     | galectin-related protein                                            | NP_001128202     | LDDGHLNLSLGS*PVQADVYFPR              | S25                  | n/a                           | n/a                         |      |
| 263 | Htatsf1     | HIV-1 Tat specific factor 1                                         | NP_001101729     | VFDD*DEKDEEDTDVIR                    | S698                 | n/a                           | n/a                         |      |
| 264 | Inad1       | PREDICTED: InaD-like (Drosophila) isoform 2                         | XP_001055452     | KTLSAS*PPEQPSR                       | S459^                | 0.37                          | 1.08                        |      |
| 265 | Jph1        | junctophilin-1                                                      | NP_001100100     | SESKSS*IS*S*KR                       | S231^, S233^, S234^  | n/a                           | n/a                         |      |
| 266 | Kif26a      | kinesin-like protein KIF26A                                         | NP_001163819     | LLPS*PAPPPP                          | S942                 | 2.42                          | 0.53                        | *‡   |
| 267 | Ktn1        | PREDICTED: kinectin 1                                               | XP_341306        | EIQNGTLHES*DSEHVQDFK                 | S75                  | 1.34                          | 1.66                        |      |
| 268 | Ktn1        | PREDICTED: kinectin 1                                               | XP_341306        | EIQNGTLHESD*EHVQDFK                  | S77^                 | 1.35                          | 1.63                        |      |
| 269 | Lad1        | ladinin                                                             | NP_001101412     | ALPGKS*PPSSAEQSPDPPTK                | S320^                | -0.04                         | 0.30                        |      |
| 270 | Lad1        | ladinin                                                             | NP_001101412     | GRPEETAQQQS*PVSEK                    | S181                 | n/a                           | n/a                         |      |
| 271 | Lad1        | ladinin                                                             | NP_001101412     | LPS*VEEAESVSKPSPAS*K                 | S62, S76^            | 1.10                          | 0.59                        |      |
| 272 | Lad1        | ladinin                                                             | NP_001101412     | LPS*VEEAESVSKPSPAS*KDEGEFFQAILR      | S62^, S76^           | 0.68                          | 1.07                        |      |
| 273 | Lad1        | ladinin                                                             | NP_001101412     | LPS*VEEAESVSKPSPASK                  | S62                  | 0.34                          | 0.21                        |      |
| 274 | Lad1        | ladinin                                                             | NP_001101412     | LPS*VEEAESVSKPSPASKDEGEFFQAILR       | S62                  | n/a                           | n/a                         |      |
| 275 | Lad1        | ladinin                                                             | NP_001101412     | NLS*STTEDESPK                        | S38                  | n/a                           | n/a                         |      |
| 276 | Lad1        | ladinin                                                             | NP_001101412     | S*VEEAESVSKPSPASK                    | S62                  | -0.15                         | 0.24                        |      |
| 277 | Lad1        | ladinin                                                             | NP_001101412     | S*VEEAESVSKPSPASKDEGEFFQAILR         | S62                  | n/a                           | n/a                         |      |
| 278 | Larp1       | PREDICTED: la related protein                                       | XP_220446        | ESPRPPAAEAAPGS*DGEDGGR               | S132                 | n/a                           | n/a                         |      |
| 279 | Larp7       | la-related protein 7                                                | NP_001037755     | ELVDS*SS*SGVSKATK                    | S166                 | -0.62                         | 0.30                        |      |
| 280 | Lcp1        | plastin-2                                                           | NP_001012044     | GS*VSEEMMLER                         | S5^                  | n/a                           | n/a                         |      |
| 281 | Lig4        | ligase IV, DNA, ATP-dependent                                       | NP_001099565     | AAEIVPS*DMYKTGSTRFPRIK               | S567^                | 0.66                          | 1.24                        |      |
| 282 | Lima1       | PREDICTED: LIM domain and actin binding 1                           | XP_217039        | FGS*RPEAVTQCR                        | S132                 | 2.88                          | 0.51                        | *‡   |
| 283 | Lima1       | PREDICTED: LIM domain and actin binding 1                           | XP_217039        | GENEETLGRPAQPSPAGET*PHSPGVDAPIAK     | T485                 | n/a                           | n/a                         |      |
| 284 | Lima1       | PREDICTED: LIM domain and actin binding 1                           | XP_217039        | GENEETLGRPAQPSPAGETPHS*PGVEDAPIAK    | S488                 | 0.59                          | 0.81                        |      |
| 285 | Lima1       | PREDICTED: LIM domain and actin binding 1                           | XP_217039        | GWSEPEPEQSEFFGGGT*VQT*ESPRPSR        | T634^                | n/a                           | n/a                         |      |
| 286 | Lima1       | PREDICTED: LIM domain and actin binding 1                           | XP_217039        | KGWSEPEPEQSEFFGGGT*VQT*ESPRPSR       | S640                 | n/a                           | n/a                         |      |
| 287 | Lima1       | PREDICTED: LIM domain and actin binding 1                           | XP_217039        | PAQPSPAGETPHS*PGVEDAPIAK             | S488                 | 3.77                          | 3.39                        |      |
| 288 | Lima1       | PREDICTED: LIM domain and actin binding 1                           | XP_217039        | RLS*ENSCSLDDLLEIGAGHLSAFAFNSEK       | S225                 | 0.74                          | 0.79                        |      |
| 289 | Lima1       | PREDICTED: LIM domain and actin binding 1                           | XP_217039        | RLENSCS*LDLLEIGAGHLSAFAFNSEK         | S230^                | 0.46                          | 0.50                        |      |
| 290 | Lima1       | PREDICTED: LIM domain and actin binding 1                           | XP_217039        | S*PLEPESPGWPGFGDTTAK                 | S697                 | 1.13                          | 0.47                        |      |
| 291 | Lima1       | PREDICTED: LIM domain and actin binding 1                           | XP_217039        | SEAQQPIYTKPLS*PDAR                   | S360                 | 0.76                          | 0.92                        |      |
| 292 | Lima1       | PREDICTED: LIM domain and actin binding 1                           | XP_217039        | TSSVKS*PKPLSPSLR                     | S603^                | -1.42                         | 1.04                        |      |
| 293 | Llg2        | lethal(2) giant larvae protein homolog 2                            | NP_001121021     | SQS*DGAETKPGVMEHALLSDAWVLK           | S970^                | -0.88                         | 0.93                        |      |
| 294 | Lmna        | lamin-A isoform C2                                                  | NP_001002016     | LRLS*PSPTQR                          | S389                 | -0.74                         | 0.17                        | *‡   |
| 295 | Lmo7        | LIM domain only protein 7                                           | NP_001001515     | EVSR*PDQFSDMR                        | S1061                | -1.13                         | 1.18                        |      |
| 296 | Lmo7        | LIM domain only protein 7                                           | NP_001001515     | S*KLSLSDVSAEDVQSLR                   | S650                 | -0.86                         | 0.56                        |      |
| 297 | Lmo7        | LIM domain only protein 7                                           | NP_001001515     | S*LSDVSAEDVQSLR                      | S652                 | 1.21                          | 1.15                        |      |
| 298 | Lmo7        | LIM domain only protein 7                                           | NP_001001515     | SKS*LDVSAEDVQSLR                     | S652^                | n/a                           | n/a                         |      |
| 299 | Lmo7        | LIM domain only protein 7                                           | NP_001001515     | SLS*DVSAEDVQSLR                      | S654                 | 1.20                          | 1.14                        |      |
| 300 | Lmo7        | LIM domain only protein 7                                           | NP_001001515     | RGES*LDNLSQRPQSWR                    | S1563                | 0.01                          | 0.12                        |      |
| 301 | LOC360570   | myosin 18a                                                          | NP_001165608     | RFS*FSQR                             | S140                 | 0.12                          | 0.41                        |      |
| 302 | LOC360570   | myosin 18a                                                          | NP_001165608     | SLAPDLS*DEHDVDPVDSISRPR              | S2020                | 0.12                          | 0.30                        |      |
| 303 | LOC360713   | PREDICTED: pleckstrin homology-like domain, family B, member 2-like | XP_001066275     | KGS*LQVDIAGFGLGHSASFAPR              | S510                 | 1.22                          | 0.17                        | *‡   |
| 304 | LOC360713   | PREDICTED: pleckstrin homology-like domain, family B, member 2-like | XP_001066275     | RLS*AGTTVADVQK                       | S465                 | 2.66                          | 2.56                        |      |
| 305 | LOC361100   | topoisomerase II beta                                               | NP_001094328     | KTSFDQDS*DVIDFSDTSEPPALPR            | S1570                | n/a                           | n/a                         |      |

| #   | Gene Symbol | Protein Name                                                                                                                                                                                 | Refseq Accession | Peptide Sequence                   | Site(s)                               | Log <sub>2</sub> (HV)<br>Mean | Log <sub>2</sub> (HV)<br>SE | Sig. |
|-----|-------------|----------------------------------------------------------------------------------------------------------------------------------------------------------------------------------------------|------------------|------------------------------------|---------------------------------------|-------------------------------|-----------------------------|------|
| 306 | LOC361346   | hypothetical protein LOC361346 precursor                                                                                                                                                     | NP_001017462     | SKKY*IGRQDSLDIK                    | Y155 <sup>^</sup>                     | 0.25                          | 1.06                        |      |
| 307 | LOC366669   | PREDICTED: similar to Nesprin-2 (Nuclear envelope spectrin repeat protein 2) (Synne-2) (Synaptic nuclear envelope protein 2) (Nucleus and actin connecting element protein) (NUANCE protein) | XP_001080795     | LTSHPTGLDDEKEAS*ENETDIEDPR         | S6383 <sup>^</sup>                    | n/a                           | n/a                         |      |
| 308 | LOC366669   | PREDICTED: similar to Nesprin-2 (Nuclear envelope spectrin repeat protein 2) (Synne-2) (Synaptic nuclear envelope protein 2) (Nucleus and actin connecting element protein) (NUANCE protein) | XP_001080795     | SISEGHPWHVPDS*PSHSK                | S6483 <sup>^</sup>                    | 0.15                          | 1.11                        |      |
| 309 | LOC366669   | PREDICTED: similar to Nesprin-2 (Nuclear envelope spectrin repeat protein 2) (Synne-2) (Synaptic nuclear envelope protein 2) (Nucleus and actin connecting element protein) (NUANCE protein) | XP_001080795     | TEEGDT*PIEALLDFPR                  | T4207                                 | n/a                           | n/a                         |      |
| 310 | LOC680758   | PREDICTED: rCG41835-like                                                                                                                                                                     | XP_001058748     | DGIHT*PVRERPEE                     | T120                                  | -1.69                         | 1.46                        |      |
| 311 | LOC681101   | PREDICTED: hypothetical protein                                                                                                                                                              | XP_001060309     | WPPGPAAGS*APSGDGR                  | S125                                  | -0.27                         | 0.19                        |      |
| 312 | LOC684097   | sorting nexin-3                                                                                                                                                                              | NP_001037748     | RYS*DFEWLR                         | S72                                   | 3.47                          | 0.34                        | *‡   |
| 313 | LOC684233   | PREDICTED: spenito-like                                                                                                                                                                      | XP_001068152     | SLS*PGGAALGYR                      | S293                                  | 0.72                          | 0.68                        |      |
| 314 | LOC685179   | PREDICTED: SWI/SNF-related matrix-associated actin-dependent regulator of chromatin c2 isoform 2                                                                                             | XP_001055673     | DMDEPS*PVPNVEEVTLPK                | S347                                  | n/a                           | n/a                         |      |
| 315 | LOC688084   | PREDICTED: similar to COLLAGEN family member (col-183)                                                                                                                                       | XP_001081078     | NPS*APGP                           | S55                                   | n/a                           | n/a                         |      |
| 316 | LOC688230   | PREDICTED: hypothetical protein                                                                                                                                                              | XP_001081555     | LREEEFKAVS*KDLPVDY*DDK             | S3575, Y3582                          | 0.91                          | 1.07                        |      |
| 317 | LOC688292   | PREDICTED: caspase recruitment domain family, member 14-like                                                                                                                                 | XP_001081765     | EENEKLRSMT*FSLVEK                  | T278 <sup>^</sup>                     | 4.47                          | 0.42                        | *‡   |
| 318 | LOC688717   | SRA stem-loop-interacting RNA-binding protein, mitochondrial                                                                                                                                 | NP_001102977     | VLHGAQTS*DEEKDF                    | S105                                  | 0.17                          | 0.58                        |      |
| 319 | LOC690284   | PREDICTED: rCG64368-like                                                                                                                                                                     | XP_001073960     | VIS*GPS*DOVRK                      | S441, S444                            | n/a                           | n/a                         |      |
| 320 | Lpp         | lipoma-preferred partner homolog                                                                                                                                                             | NP_001013886     | RS*SLDAEIDSLTSLADLECCSSPYKPR       | S116 <sup>^</sup>                     | 1.15                          | 1.47                        |      |
| 321 | Lpp         | lipoma-preferred partner homolog                                                                                                                                                             | NP_001013886     | RSS*LDAAEIDSLTSLADLECCSSPYKPR      | S117 <sup>^</sup>                     | 0.97                          | 1.31                        |      |
| 322 | Lrba        | lipopolysaccharide-responsive and beige-like anchor protein                                                                                                                                  | NP_001102025     | KES*LISPHFTTNSDENSSIGK             | S898                                  | 4.45                          | 0.17                        | *‡   |
| 323 | Lrba        | lipopolysaccharide-responsive and beige-like anchor protein                                                                                                                                  | NP_001102025     | VEGIEGS*PAEEAR                     | S1037                                 | -0.08                         | 0.98                        |      |
| 324 | Lrrc47      | leucine rich repeat containing 47                                                                                                                                                            | NP_001129138     | RES*GEGEEEVADARS                   | S292                                  | n/a                           | n/a                         |      |
| 325 | Lrrfp1      | leucine-rich repeat flightless-interacting protein 1                                                                                                                                         | NP_001014291     | AENQRPVEDSALS*PGPLAGAK             | S302                                  | 0.08                          | 0.22                        |      |
| 326 | Lsm14a      | protein LSM14 homolog A                                                                                                                                                                      | NP_001121024     | RS*PVPARPLPPTSQK                   | S216                                  | -0.88                         | 0.35                        |      |
| 327 | Lsm14a      | protein LSM14 homolog A                                                                                                                                                                      | NP_001121024     | S*SPQLDLPLRK                       | S182 <sup>^</sup>                     | 0.70                          | 0.98                        |      |
| 328 | Macf1       | microtubule-actin crosslinking factor 1                                                                                                                                                      | NP_001129230     | KLANSEPVGTQ*AK                     | T3419 <sup>^</sup>                    | -0.32                         | 0.30                        |      |
| 329 | Map2        | microtubule-associated protein 2                                                                                                                                                             | NP_037198        | KVAIRT*PPKSPAT*PK                  | T1647, T1654                          | 0.59                          | 1.68                        |      |
| 330 | Map2        | microtubule-associated protein 2                                                                                                                                                             | NP_037198        | VDHGAETIOS*PSR                     | S1780                                 | -1.99                         | 0.46                        |      |
| 331 | Map3k9      | PREDICTED: mitogen-activated protein kinase kinase 9                                                                                                                                         | XP_576071        | S*S*PALPGFTSLMEIGK                 | S655 <sup>^</sup> , S656 <sup>^</sup> | 0.19                          | 0.49                        |      |
| 332 | Map4        | microtubule-associated protein 4                                                                                                                                                             | NP_001019449     | ATS*PSTLVSTGSSSR                   | S786                                  | 0.14                          | 0.24                        |      |
| 333 | Map4        | microtubule-associated protein 4                                                                                                                                                             | NP_001019449     | RTS*PSKPPSAPALRPGPK                | S761 <sup>^</sup>                     | n/a                           | n/a                         |      |
| 334 | Map4        | microtubule-associated protein 4                                                                                                                                                             | NP_001019449     | RTSPS*KPPSAPALRPGPK                | S763 <sup>^</sup>                     | n/a                           | n/a                         |      |
| 335 | Map4        | microtubule-associated protein 4                                                                                                                                                             | NP_001019449     | VGS*LDNVGHLPAAGTVK                 | S978                                  | 1.50                          | 2.50                        |      |
| 336 | Mapt        | microtubule-associated protein tau                                                                                                                                                           | NP_058908        | KVAVVRT*PPKS*PSASK                 | T164, S168 <sup>^</sup>               | n/a                           | n/a                         |      |
| 337 | Mapt        | microtubule-associated protein tau                                                                                                                                                           | NP_058908        | VAVVRT*PPKSPAS*K                   | T164, S172 <sup>^</sup>               | -1.55                         | 1.93                        |      |
| 338 | Marcks      | PREDICTED: myristoylated alanine-rich C-kinase substrate                                                                                                                                     | XP_002729011     | EAAEAPEAGPSPS*AEETEGASASSTSSPK     | S115                                  | n/a                           | n/a                         |      |
| 339 | Matr3       | matrin-3                                                                                                                                                                                     | NP_062022        | RDS*FDDRGPSLNPVLDYDHGSR            | S188                                  | -1.59                         | 1.04                        |      |
| 340 | Mgll        | monoglyceride lipase                                                                                                                                                                         | NP_612511        | NKS*EVDLYNSDPLICHAGVK              | S189                                  | -0.09                         | 0.05                        |      |
| 341 | Mllr4       | afadin                                                                                                                                                                                       | NP_037349        | PENLT*FRERQR                       | T1795                                 | 1.88                          | 1.83                        |      |
| 342 | Mme         | nephrysin                                                                                                                                                                                    | NP_036740        | GRS*ESQMDITDINAPKPK                | S4                                    | 1.31                          | 0.17                        | *‡   |
| 343 | Mme         | nephrysin                                                                                                                                                                                    | NP_036740        | GRSES*QMDITDINAPKPK                | S6 <sup>^</sup>                       | 1.71                          | 0.35                        |      |
| 344 | Mmm1        | PREDICTED: rCG55340-like                                                                                                                                                                     | XP_001065496     | YVSVLQET*ASKOGLMLLQMLSDLHVQESK     | T522 <sup>^</sup>                     | 1.52                          | 0.73                        |      |
| 345 | Mrp147      | 39S ribosomal protein L47, mitochondrial                                                                                                                                                     | NP_001032260     | KSS*TV                             | S250 <sup>^</sup> , T251 <sup>^</sup> | -0.57                         | 1.84                        |      |
| 346 | Myh9        | myosin-9                                                                                                                                                                                     | NP_037326        | KGTGDCS*DEEVGKADGADAK              | S1944                                 | n/a                           | n/a                         |      |
| 347 | Myi9        | myosin regulatory light polypeptide 9                                                                                                                                                        | NP_001094355     | ATS*NVFAMFDQSQIQEFK                | S20                                   | n/a                           | n/a                         |      |
| 348 | Myi9        | myosin regulatory light polypeptide 9                                                                                                                                                        | NP_001094355     | AT*SNVFMFDQSQIQEFK                 | T19 <sup>^</sup>                      | n/a                           | n/a                         |      |
| 349 | Nap114      | nucleosome assembly protein 1-like 4                                                                                                                                                         | NP_001012170     | EFITGDVEPTDAEASAWHS*EENEEDDLKAGDMK | S125                                  | 0.23                          | 0.28                        |      |
| 350 | Ncbp1       | nuclear cap-binding protein subunit 1                                                                                                                                                        | NP_001014785     | KTS*GANETEDHLESICK                 | S22                                   | n/a                           | n/a                         |      |
| 351 | Nck1        | cytoplasmic protein NCK1                                                                                                                                                                     | NP_001100321     | RKPS*VPDTASPADDSFVDPGER            | S85                                   | 1.11                          | 0.85                        |      |
| 352 | Ndrg1       | protein NDRG1                                                                                                                                                                                | NP_001011991     | T*AGSSVTSLEGTR                     | T328                                  | 0.80                          | 1.08                        |      |
| 353 | Ndrg1       | protein NDRG1                                                                                                                                                                                | NP_001011991     | TAS*GSSVTSLEGTR                    | S330                                  | -0.16                         | 0.13                        |      |
| 354 | Ndrg2       | protein NDRG2                                                                                                                                                                                | NP_598267        | T*ASLTSAAIDGSR                     | T316 <sup>^</sup>                     | 1.52                          | 0.30                        | *‡   |
| 355 | Ndrg3       | protein NDRG3                                                                                                                                                                                | NP_001013945     | SVTSNQSDGTQESCES*PDVLDLDR          | S361                                  | n/a                           | n/a                         |      |
| 356 | Nfib        | nuclear factor 1 B-type                                                                                                                                                                      | NP_113754        | KPEKPLFSST*PODSSPR                 | S328 <sup>^</sup>                     | -0.30                         | 0.23                        |      |
| 357 | Nid2        | nidogen-2                                                                                                                                                                                    | NP_001012005     | SFSLIS*GS*INOTRSYR                 | S705, S707                            | 6.24                          | 6.81                        |      |
| 358 | Nkapl       | NKAP-like protein                                                                                                                                                                            | NP_001025084     | IGELGAPEVWGLS*PK                   | S139                                  | -0.19                         | 0.24                        |      |
| 359 | Nop56       | nucleolar protein 56                                                                                                                                                                         | NP_001020903     | EELAS*DEEEMATSSISVPK               | S517                                  | n/a                           | n/a                         |      |
| 360 | Nop56       | nucleolar protein 56                                                                                                                                                                         | NP_001020903     | KFS*EEPEAAASCTK                    | S561                                  | 0.48                          | 0.11                        |      |
| 361 | Nop58       | nucleolar protein 58                                                                                                                                                                         | NP_068522        | HIKEEPLS*EEEPCTSTAVPSPEK           | S507                                  | n/a                           | n/a                         |      |
| 362 | Nop58       | nucleolar protein 58                                                                                                                                                                         | NP_068522        | HIKEEPLS*EEEPCTSTAVPSPEK           | S507                                  | -1.08                         | 0.38                        |      |
| 363 | Npat        | protein NPAT                                                                                                                                                                                 | NP_001101617     | HTT*VKEVQSEKK                      | T1130 <sup>^</sup>                    | n/a                           | n/a                         |      |
| 364 | Npm1        | nucleophosmin                                                                                                                                                                                | NP_037124        | CGSGPVHISGQHLVAVEEADAE*EDEEEDVVK   | S125                                  | n/a                           | n/a                         |      |
| 365 | Nsd1        | histone-lysine N-methyltransferase, H3 lysine-36 and H4 lysine-20 specific                                                                                                                   | NP_001100807     | SLS*EDVSDSGTSK                     | S564 <sup>^</sup>                     | n/a                           | n/a                         |      |
| 366 | Nsfl1c      | NSFL1 cofactor p47                                                                                                                                                                           | NP_114187        | KKS*PNELVDLFLK                     | S114                                  | n/a                           | n/a                         |      |
| 367 | Nsfl1c      | NSFL1 cofactor p47                                                                                                                                                                           | NP_114187        | RHS*GQDVHVVLK                      | S176                                  | 0.76                          | 0.98                        |      |
| 368 | Nucb1       | nucleobindin-1 precursor                                                                                                                                                                     | NP_445915        | SGKLS*QELDFVSHNVR                  | S85                                   | -0.26                         | 0.18                        |      |
| 369 | Nucks1      | nuclear ubiquitously casein and cyclin-dependent kinases substrate                                                                                                                           | NP_073636        | KVVDYSQFQES*DDADEDYGR              | S19                                   | n/a                           | n/a                         |      |
| 370 | Nucks1      | nuclear ubiquitously casein and cyclin-dependent kinases substrate                                                                                                                           | NP_073636        | VVDYSQFQES*DDADEDYGR               | S19                                   | n/a                           | n/a                         |      |
| 371 | Numa1       | PREDICTED: nuclear mitotic apparatus protein 1                                                                                                                                               | XP_218972        | AAQLQGS*PAPEKGEVLGDALQLDLTK        | S416                                  | 1.07                          | 0.66                        |      |
| 372 | Numa1       | PREDICTED: nuclear mitotic apparatus protein 1                                                                                                                                               | XP_218972        | TQPDGTSVPGEPAS*PISQR               | S1769                                 | -0.13                         | 0.40                        |      |
| 373 | Numa1       | PREDICTED: nuclear mitotic apparatus protein 1                                                                                                                                               | XP_218972        | VPSTYPTSLSEELS*PPSHQAK             | S185                                  | -0.14                         | 0.36                        |      |

| #   | Gene Symbol | Protein Name                                                                                       | Refseq Accession | Peptide Sequence                     | Site(s)        | Log <sub>2</sub> (HV)<br>Mean | Log <sub>2</sub> (HV)<br>SE | Sig. |
|-----|-------------|----------------------------------------------------------------------------------------------------|------------------|--------------------------------------|----------------|-------------------------------|-----------------------------|------|
| 374 | Nup98       | nuclear pore complex protein Nup98                                                                 | NP_112336        | NLNNSNLFSPVNHDESLAS*PSEYPENGER       | S623^          | n/a                           | n/a                         |      |
| 375 | Olr1061     | olfactory receptor Olr1061                                                                         | NP_001000065     | MSNS*GLR                             | S4             | n/a                           | n/a                         |      |
| 376 | Osbp        | oxysterol-binding protein 1                                                                        | NP_001102397     | GDMS*DEDDNEFFDAPEIITMPENLGHK         | S226           | 1.08                          | 1.39                        |      |
| 377 | Palm        | paralemin                                                                                          | NP_570842        | LNGS*AAELPATK                        | S345           | 0.66                          | 0.90                        |      |
| 378 | Palm        | paralemin                                                                                          | NP_570842        | SETMVNAQQTPLGT*PK                    | T145           | -1.09                         | 0.17                        | *‡   |
| 379 | Palmd       | palmdelphin                                                                                        | NP_001020859     | SNGLAHTS*PTRPTPOQR                   | S322^          | n/a                           | n/a                         |      |
| 380 | Pard3       | partitioning defective 3 homolog                                                                   | NP_112514        | RSS*DPALTGLSTVSDNFSSEEPSR            | S144           | n/a                           | n/a                         |      |
| 381 | Pclo        | protein piccolo isoform 2                                                                          | NP_001104267     | KLAAVAAT*VT*STTIVTHV/DALTMVEAAAAAR   | T2394^, T2396^ | 0.29                          | 1.14                        |      |
| 382 | Pdha1       | pyruvate dehydrogenase E1 component subunit alpha, somatic form, mitochondrial precursor           | NP_001004072     | Y*HGHSMSDPGVSY*YR                    | Y289, S300     | n/a                           | n/a                         |      |
| 383 | Pdha1       | pyruvate dehydrogenase E1 component subunit alpha, somatic form, mitochondrial precursor           | NP_001004072     | YGMGT*SVER                           | T231           | 0.80                          | 0.76                        |      |
| 384 | Pdha1       | pyruvate dehydrogenase E1 component subunit alpha, somatic form, mitochondrial precursor           | NP_001004072     | YGMGTS*VER                           | S232           | -0.14                         | 0.07                        |      |
| 385 | Pdha1       | pyruvate dehydrogenase E1 component subunit alpha, somatic form, mitochondrial precursor           | NP_001004072     | YHGHS*MSDPGVSY*YR                    | S293, S300     | -0.25                         | 0.08                        |      |
| 386 | Pdha1       | pyruvate dehydrogenase E1 component subunit alpha, somatic form, mitochondrial precursor           | NP_001004072     | YHGHS*MSDPGVSY*R                     | S293, Y301     | 0.51                          | 0.79                        |      |
| 387 | Pdha1       | pyruvate dehydrogenase E1 component subunit alpha, somatic form, mitochondrial precursor           | NP_001004072     | YHGHS*MSDPGVSYR                      | S293           | -0.97                         | 1.07                        |      |
| 388 | Pdha1       | pyruvate dehydrogenase E1 component subunit alpha, somatic form, mitochondrial precursor           | NP_001004072     | YHGHSMS*DPGVSY*YR                    | S295^, S300^   | -1.45                         | 0.88                        |      |
| 389 | Pdha1       | pyruvate dehydrogenase E1 component subunit alpha, somatic form, mitochondrial precursor           | NP_001004072     | YHGHSMS*DPGVSY*R                     | S295^, Y301^   | n/a                           | n/a                         |      |
| 390 | Pdha1       | pyruvate dehydrogenase E1 component subunit alpha, somatic form, mitochondrial precursor           | NP_001004072     | YHGHSMS*DPGVSYR                      | S295           | -0.07                         | 0.15                        |      |
| 391 | Pdha1       | pyruvate dehydrogenase E1 component subunit alpha, somatic form, mitochondrial precursor           | NP_001004072     | YHGHSMSDPGVSY*YR                     | S300^          | -0.11                         | 0.18                        |      |
| 392 | Pds5b       | sister chromatid cohesion protein PDS5 homolog B isoform 1                                         | NP_001095853     | AESPETS*AVESTQSTPQK                  | S1364^         | n/a                           | n/a                         |      |
| 393 | Pdxd1       | pyridoxal-dependent decarboxylase domain-containing protein 1                                      | NP_001128433     | VQGTGVT*PPPTPSGTR                    | T687           | 0.80                          | 0.06                        |      |
| 394 | Pebp1       | phosphatidylethanolamine-binding protein 1                                                         | NP_058932        | VLTPQVMNRPSS*SIWDGLDPGK              | S51            | 0.15                          | 0.28                        |      |
| 395 | Pebp1       | phosphatidylethanolamine-binding protein 1                                                         | NP_058932        | VLTPQVMNRPSS*SIWDGLDPGK              | S52            | 0.14                          | 0.28                        |      |
| 396 | Pebp1       | phosphatidylethanolamine-binding protein 1                                                         | NP_058932        | FKVES*FR                             | S153           | -0.50                         | 0.12                        | *    |
| 397 | Pex19       | peroxisomal biogenesis factor 19 isoform 2                                                         | NP_001128249     | AKPS*PAPS*PTISAPDASGPQK              | S35, S39^      | n/a                           | n/a                         |      |
| 398 | Pex19       | peroxisomal biogenesis factor 19 isoform 2                                                         | NP_001128249     | AKPS*PAPSPT*ISAPDASGPQK              | S35, T41       | n/a                           | n/a                         |      |
| 399 | Pgm1        | phosphoglucomutase-1                                                                               | NP_058729        | AIGIILTAS*HNPGGPNGDFGIK              | S117           | 0.28                          | 0.13                        |      |
| 400 | Pgrmc2      | membrane-associated progesterone receptor component 2                                              | NP_001008375     | LLKPGEPESEY*DEEDTK                   | Y204           | 1.21                          | 0.79                        |      |
| 401 | Pgrmc2      | membrane-associated progesterone receptor component 2                                              | NP_001008375     | LLKPGEPESEY*DEEDTKDHSKQD             | Y204^          | -4.78                         | 2.49                        |      |
| 402 | Pgrmc2      | membrane-associated progesterone receptor component 2                                              | NP_001008375     | LLKPGEPESEY*DEEDTK                   | T205           | 2.48                          | 1.16                        |      |
| 403 | Pgrmc2      | membrane-associated progesterone receptor component 2                                              | NP_001008375     | LLKPGEPESEY*DEEDTKDHSK               | T205           | 0.24                          | 0.57                        |      |
| 404 | Pgrmc2      | membrane-associated progesterone receptor component 2                                              | NP_001008375     | LLKPGEPESEY*DEEDTKDHSKQD             | T205           | -4.82                         | 2.48                        |      |
| 405 | Phactr1     | phosphatase and actin regulator 1                                                                  | NP_999622        | RLS*QRPTAELEQR                       | S467           | 2.16                          | 2.53                        |      |
| 406 | Phlpp1      | PH domain leucine-rich repeat protein phosphatase 1                                                | NP_067689        | GKMLPLVNRWTR                         | T521           | n/a                           | n/a                         |      |
| 407 | Pi4kb       | phosphatidylinositol 4-kinase beta                                                                 | NP_112345        | S*VENLPEGGITHEQR                     | S428^          | n/a                           | n/a                         |      |
| 408 | Pkn2        | serine/threonine-protein kinase N2                                                                 | NP_001099225     | AS*SLGEIDDSSELR                      | S581^          | n/a                           | n/a                         |      |
| 409 | Pkp2        | plakophilin-2                                                                                      | NP_001093969     | TSS*VPEYVYK                          | S82            | 0.91                          | 2.12                        |      |
| 410 | Plec        | plectin isoform 1c                                                                                 | NP_001157768     | SSS*VGSSSSYPISSAVPR                  | S4275          | 0.82                          | 0.23                        |      |
| 411 | Plekha6     | PREDICTED: pleckstrin homology domain containing, family A member 6                                | XP_341119        | YIDLEPVAPLS*PEELK                    | S1167          | n/a                           | n/a                         |      |
| 412 | Plekha6     | PREDICTED: pleckstrin homology domain containing, family A member 6                                | XP_341119        | HRS*IHVDISNLEAALR                    | S1094          | 0.45                          | 1.03                        |      |
| 413 | Plekha6     | PREDICTED: pleckstrin homology domain containing, family A member 6                                | XP_341119        | S*IHVDISNLEAALR                      | S1094          | 1.45                          | 0.17                        | *‡   |
| 414 | Plekha6     | PREDICTED: pleckstrin homology domain containing, family A member 6                                | XP_341119        | T*KSPAEEITPSAVVR                     | T1001          | 1.79                          | 2.16                        |      |
| 415 | Plekha6     | PREDICTED: pleckstrin homology domain containing, family A member 6                                | XP_341119        | TKS*PAEEITPSAVVR                     | S1003          | 0.25                          | 0.60                        |      |
| 416 | Plekha6     | PREDICTED: pleckstrin homology domain containing, family G (with RhoGef domain) member 3 isoform 2 | XP_234320        | RRES*LSYIPK                          | S1064          | 3.34                          | 3.05                        |      |
| 417 | Plixdc2     | plexin domain-containing protein 2                                                                 | NP_001101892     | RGSG*GHPVAEVEPVGEK                   | S507           | 1.69                          | 0.32                        | *‡   |
| 418 | Pnn         | pinin                                                                                              | NP_001102493     | QES*DPEDDVKKPALQSSVAVTSK             | S100^          | n/a                           | n/a                         |      |
| 419 | Pnn         | pinin                                                                                              | NP_001102493     | S*LSPGKENINSLEVEK                    | S440^          | -2.58                         | 1.26                        |      |
| 420 | Pnn         | pinin                                                                                              | NP_001102493     | SLS*PGKENINSLEVEK                    | S442           | -2.58                         | 1.26                        |      |
| 421 | Pp1b1       | liprin-beta-1                                                                                      | NP_001101366     | RRPS*DENISITPSEQQWTHNR               | S713           | 0.36                          | 0.23                        |      |
| 422 | Ppm1g       | protein phosphatase 1G                                                                             | NP_671742        | KLEEALST*EGAENGNSDK                  | T525^          | n/a                           | n/a                         |      |
| 423 | Ppp1r1a     | protein phosphatase 1 regulatory subunit 1A                                                        | NP_073167        | RPT*PATLVLTSDDSSPEVEDRIPNPLLK        | T35            | 1.53                          | 0.20                        | *‡   |
| 424 | Ppp1r1a     | protein phosphatase 1 regulatory subunit 1A                                                        | NP_073167        | RPTPATLVL*SDQSSPEVEDR                | T42^           | n/a                           | n/a                         |      |
| 425 | Ppp1r1a     | protein phosphatase 1 regulatory subunit 1A                                                        | NP_073167        | RRPT*PATLVLTSDDSSPEVEDR              | T35            | n/a                           | n/a                         |      |
| 426 | Ppp1r1a     | protein phosphatase 1 regulatory subunit 1A                                                        | NP_073167        | RRPTATLVLTSDDQSS*PEVEDRIPNPLLK       | S47^           | -0.16                         | 0.14                        |      |
| 427 | Ppp1r1a     | protein phosphatase 1 regulatory subunit 1A                                                        | NP_073167        | STLSMS*PR                            | S67            | n/a                           | n/a                         |      |
| 428 | Ppp1r1b     | protein phosphatase 1 regulatory subunit 1B                                                        | NP_612530        | IAESHLOTISNISENQAS*EEDELGELR         | S102           | 0.20                          | 0.08                        |      |
| 429 | Ppp1r1b     | protein phosphatase 1 regulatory subunit 1B                                                        | NP_612530        | RRPT*PALLFR                          | T34            | 6.20                          | 0.49                        | *‡   |
| 430 | Ppp1r2      | protein phosphatase inhibitor 2                                                                    | NP_620178        | IDEPDTPYHNMIGDDEDVCS*DSEGENVMTPEILAK | S87^           | n/a                           | n/a                         |      |
| 431 | Ppp2r5d     | PREDICTED: delta isoform of regulatory subunit B56, protein phosphatase 2A                         | XP_001062510     | RKS*ELPDQVYTIK                       | S632           | 2.11                          | 0.46                        | *‡   |
| 432 | Ptcp        | enhanced at puberty protein 1                                                                      | NP_001012488     | KAS*PEPPDSEASALK                     | S534           | -1.06                         | 1.22                        |      |
| 433 | Prkab1      | 5'-AMP-activated protein kinase subunit beta-1                                                     | NP_114182        | CSDVSELSSS*PPGPHYHQEPIYSKPEER        | S182^          | -0.20                         | 0.44                        |      |
| 434 | Prkab2      | cAMP-dependent protein kinase catalytic subunit beta                                               | NP_001071113     | T*WLCGTPEYLAEILSK                    | T196^          | 0.87                          | 1.71                        |      |

| #   | Gene Symbol          | Protein Name                                                                            | Refseq Accession | Peptide Sequence               | Site(s)             | Log <sub>2</sub> (H/V)<br>Mean | Log <sub>2</sub> (H/V)<br>SE | Sig. |
|-----|----------------------|-----------------------------------------------------------------------------------------|------------------|--------------------------------|---------------------|--------------------------------|------------------------------|------|
| 435 | Prkacb               | cAMP-dependent protein kinase catalytic subunit beta                                    | NP_001071113     | TWT*LCGTPEYLPEILSK             | T198^               | 0.84                           | 1.76                         |      |
| 436 | Prkar1a              | cAMP-dependent protein kinase type I-alpha regulatory subunit                           | NP_037313        | EDEIS*PPPPNPVK                 | S83                 | 2.23                           | 1.49                         |      |
| 437 | Prkar1a              | cAMP-dependent protein kinase type I-alpha regulatory subunit                           | NP_037313        | TDSREDEIS*PPPPNPVK             | S83                 | 0.61                           | 1.86                         |      |
| 438 | Prkar2a              | cAMP-dependent protein kinase type II-alpha regulatory subunit                          | NP_062137        | RVS*VCAETFPNDEEDNDPR           | S97                 | 0.38                           | 0.63                         |      |
| 439 | Prkar2b              | cAMP-dependent protein kinase type II-beta regulatory subunit                           | NP_001025191     | RAS*VCAEAYNPDEEDDAESR          | S112                | n/a                            | n/a                          |      |
| 440 | Prkod                | protein kinase C delta type                                                             | NP_579841        | SPSDYSNFDPEFLNEKPLQLS*FSDK     | S643                | 0.26                           | 0.11                         |      |
| 441 | Prkod                | protein kinase C delta type                                                             | NP_579841        | SPSDYSNFDPEFLNEKPLQLS*DK       | S645^               | n/a                            | n/a                          |      |
| 442 | Prkocbp              | protein kinase C delta-binding protein                                                  | NP_604444        | KGS*EAAQPTPVKPPR               | S199^               | -0.08                          | 0.27                         |      |
| 443 | Prpsap1              | phosphoribosyl pyrophosphate synthase-associated protein 1                              | NP_071990        | LGLVAIHGEAQCTELMDDGRHS*PPMVK   | S244                | n/a                            | n/a                          |      |
| 444 | Psap                 | sulfated glycoprotein 1 isoform A preproprotein                                         | NP_037145        | NGGFCEVCKLVII*LEHLEKNSTK       | Y448                | -0.10                          | 0.47                         |      |
| 445 | Ptpn18               | tyrosine-protein phosphatase non-receptor type 18                                       | NP_001013129     | IQRPVVS*HTENAQGTALGR           | S393                | n/a                            | n/a                          |      |
| 446 | Ptpn21               | tyrosine-protein phosphatase non-receptor type 21                                       | NP_598229        | RNS*IEIAGLTHGFEGLR             | S637                | 0.28                           | 0.53                         |      |
| 447 | Ptfr                 | polymerase I and transcript release factor                                              | NP_001099311     | ATEEPPSGTS*DELIK               | S42                 | 1.44                           | 1.27                         |      |
| 448 | Pum1                 | pumilio homolog 1                                                                       | NP_001102154     | RDS*LTGSSDLTK                  | S710                | 1.52                           | 0.13                         | ‡    |
| 449 | Pxn                  | paxillin                                                                                | NP_001012147     | TGS*SSPPGGLSKPGSQDMLGSLQSDLNK  | S315                | 1.00                           | 0.19                         | ‡    |
| 450 | Pxn                  | paxillin                                                                                | NP_001012147     | TGSS*PPGGLSKPGSQDMLGSLQSDLNK   | S317^               | 0.97                           | 0.13                         |      |
| 451 | Pxn                  | paxillin                                                                                | NP_001012147     | YAHQQPPS*PSPIYSSSTK            | S83                 | -0.09                          | 0.20                         |      |
| 452 | Qdpr                 | dihydropteridine reductase                                                              | NP_071785        | SLFKNCDLMMWQSIWTS*TISSHLATKHLK | S112^               | n/a                            | n/a                          |      |
| 453 | Rai1                 | PREDICTED: retinoic acid induced 1                                                      | XP_220520        | SCT*APSAQPHDRPMSANASLAPGQR     | T232                | n/a                            | n/a                          |      |
| 454 | Raly                 | RNA-binding protein Raly                                                                | NP_001011958     | GRLS*PVVPPVR                   | S119                | -0.90                          | 0.57                         |      |
| 455 | Ranbp2               | PREDICTED: RAN binding protein 2 isoform 2                                              | XP_215401        | QNQPTSVAVSAPASS*ETSKSPK        | S1638^              | n/a                            | n/a                          |      |
| 456 | Ranbp2               | PREDICTED: RAN binding protein 2 isoform 2                                              | XP_215401        | QNQPTSVAVSAPASSETS*KSPK        | S1641^              | n/a                            | n/a                          |      |
| 457 | Ranbp2               | PREDICTED: RAN binding protein 2 isoform 2                                              | XP_215401        | QNQPTSVAVSAPASSETS*PK          | S1643               | 0.58                           | 2.15                         |      |
| 458 | Rap1gap              | PREDICTED: Rap1 GTPase-activating protein                                               | XP_233609        | RGS*ALGIGAVEESLIVPGKS*PTR      | S557, S574          | 4.98                           | 0.66                         | ‡    |
| 459 | Rap1gap              | PREDICTED: Rap1 GTPase-activating protein                                               | XP_233609        | RSS*AIENIQEVEQEK               | S589                | 2.40                           | 0.30                         | ‡    |
| 460 | Rap1gap              | PREDICTED: Rap1 GTPase-activating protein                                               | XP_233609        | RGS*MDAMGLSNK                  | S505                | 5.36                           | 0.67                         | ‡    |
| 461 | Raver1               | ribonucleoprotein PTB-binding 1                                                         | NP_001013961     | HKMS*PPPSFSEPR                 | S626                | -0.23                          | 0.11                         |      |
| 462 | Rbm14                | PREDICTED: RNA binding motif protein 14                                                 | XP_001072105     | RLS*ESQLSFR                    | S618                | 2.10                           | 0.24                         | ‡    |
| 463 | Rbm14                | PREDICTED: RNA binding motif protein 14                                                 | XP_001072105     | T*PPFFGR                       | T206                | -0.32                          | 0.16                         |      |
| 464 | Rbm39                | RNA-binding protein 39                                                                  | NP_001013225     | DKS*PVREPIDNLTPEER             | S136                | -0.05                          | 0.17                         |      |
| 465 | Rbm39                | RNA-binding protein 39                                                                  | NP_001013225     | KDKS*PVREPIDNLTPEER            | S136                | 0.67                           | 0.87                         |      |
| 466 | RGD1304931           | hypothetical protein LOC313776                                                          | NP_001101471     | YS*GSPDAAIQMSSPOLTEARPK        | S196^               | 2.05                           | 1.80                         |      |
| 467 | RGD1305269           | PREDICTED: LIM and calponin homology domains 1 isoform 4                                | XP_223397        | SINHOIES*PGER                  | S1118               | n/a                            | n/a                          |      |
| 468 | RGD1306410           | hypothetical protein LOC360768                                                          | NP_001014148     | HIEPELAGRDS*PYR                | S264                | 1.95                           | 2.20                         |      |
| 469 | RGD1308601           | hypothetical protein LOC307249                                                          | NP_001100844     | RDS*SESQLASTESDKPTTGR          | S66                 | -0.09                          | 0.56                         |      |
| 470 | RGD1308601           | hypothetical protein LOC307249                                                          | NP_001100844     | RDS*ESQLASTESDKPTTGR           | S67                 | n/a                            | n/a                          |      |
| 471 | RGD1308601           | hypothetical protein LOC307249                                                          | NP_001100844     | RDSSES*QLASTESDKPTTGR          | S69^                | n/a                            | n/a                          |      |
| 472 | RGD1309108           | PREDICTED: hypothetical protein                                                         | XP_236102        | T*IPKPKPNLKY*QT*MK             | T715, Y726, T728    | n/a                            | n/a                          |      |
| 473 | RGD1309922           | hypothetical protein LOC306007                                                          | NP_001163943     | VSKDEVQNGETAEAADS*PLKEDGLLPK   | S612                | -0.70                          | 0.41                         |      |
| 474 | RGD1310230           | mitochondrial fission factor                                                            | NP_001034104     | VLTLSERPLDFLDERPPPT*POSEEIR    | T112^               | n/a                            | n/a                          |      |
| 475 | RGD1311728           | PREDICTED: RIKEN cDNA 9130221D24-like                                                   | XP_227688        | RKT*DTVDDSSVGDHSGSLR           | T23                 | -1.47                          | 1.36                         |      |
| 476 | RGD1560083           | PREDICTED: myosin IIIA similar to DNA segment, Chr 4, ERATO Doi 22, expressed isoform 1 | XP_574090        | QLVNHPLTKT*GNLPLS*K            | T1124^, S1130^      | n/a                            | n/a                          |      |
| 477 | RGD1560286           | PREDICTED: transcription elongation factor B (SIII), polypeptide 2                      | NP_001108071     | ILGSAS*PEEEQEKPILRPTR          | S107                | -0.10                          | 0.21                         |      |
| 478 | RGD1561118           | hypothetical protein LOC500552                                                          | XP_220759        | KTTIFAEAQESS*T*VLELK           | S22, T23            | n/a                            | n/a                          |      |
| 479 | RGD1561149           | hypothetical protein LOC500552                                                          | NP_001128101     | QPS*SGGTAESVSDTASIR            | S403                | n/a                            | n/a                          |      |
| 480 | RGD1561149           | hypothetical protein LOC500552                                                          | NP_001128101     | LQLERPVS*PEAQADLQR             | S914                | -0.46                          | 0.10                         | *    |
| 481 | RGD1561445           | PREDICTED: hypothetical protein                                                         | XP_233277        | SST*TFNLEEK                    | T1543, T1544        | n/a                            | n/a                          |      |
| 482 | RGD1561963_predicted | PREDICTED: similar to Dedicator of cytokinesis protein 10 (Protein zizimin 3)           | XP_001060744     | S*YKERT*THEELAK                | S1158, Y1159, T1163 | n/a                            | n/a                          |      |
| 483 | RGD1562952_predicted | PREDICTED: similar to ErbB2 interacting protein isoform 1                               | XP_001072232     | TSEPEAETNAGNS*PVTTNR           | S580^               | n/a                            | n/a                          |      |
| 484 | RGD1563245           | PREDICTED: G protein-coupled receptor 161                                               | XP_222837        | EAAKNS*ILHVK                   | S495                | n/a                            | n/a                          |      |
| 485 | RGD1563437           | PREDICTED: enhancer trap locus 4-like                                                   | XP_001069190     | HQEETHAPGQPLHCS*TGSPGDVK       | S918^               | 0.43                           | 0.63                         |      |
| 486 | RGD1563437           | PREDICTED: enhancer trap locus 4-like                                                   | XP_001069190     | HQEETHAPGQPLHCS*TGSPGDVK       | S921^               | -0.22                          | 0.11                         |      |
| 487 | RGD1563437           | PREDICTED: enhancer trap locus 4, partial                                               | XP_214519        | LGKGS*PPPPPPPR                 | S92                 | 0.03                           | 0.27                         |      |
| 488 | RGD1564174           | PREDICTED: tensin 3                                                                     | XP_341257        | WDS*YENMSADGEVLTQGPVDSGLYAK    | S409^               | n/a                            | n/a                          |      |
| 489 | RGD1564748           | PREDICTED: mortality factor 4 like 2-like                                               | XP_228426        | RS*NPS*EEGHS*VK                | S336, S339, S344    | n/a                            | n/a                          |      |
| 490 | RGD1565496           | hypothetical protein LOC300783                                                          | NP_001100301     | WLDES*DAEMELR                  | S114                | 0.22                           | 0.40                         |      |
| 491 | Rims1                | regulating synaptic membrane exocytosis protein 1                                       | NP_439894        | S*LTKPGS*K                     | S1423, S1430        | n/a                            | n/a                          |      |
| 492 | Rnmt                 | mRNA cap guanine-N7 methyltransferase                                                   | NP_001008300     | GGGSEDEPS*PGGLTER              | S99                 | n/a                            | n/a                          |      |
| 493 | Rpl35                | 60S ribosomal protein L35                                                               | NP_997676        | QLDLKVELS*QLR                  | S29                 | 0.15                           | 0.38                         |      |
| 494 | Rps3                 | 40S ribosomal protein S3                                                                | NP_001009239     | DEILPT*PISEOK                  | T220^               | 2.53                           | 2.35                         |      |
| 495 | Rps3                 | 40S ribosomal protein S3                                                                | NP_001009239     | DEILPT*PISEOK                  | T221                | 2.53                           | 2.35                         |      |
| 496 | Rras2                | ras-related protein R-Ras2                                                              | NP_001013452     | FQEQECPSS*PEPTR                | S186                | 0.22                           | 0.37                         |      |
| 497 | Rras2                | ras-related protein R-Ras2                                                              | NP_001013452     | FQEQECPSS*PEPTRK               | S186                | -0.96                          | 0.73                         |      |
| 498 | Rras2                | ras-related protein R-Ras2                                                              | NP_001013452     | KFQEQECPSS*PEPTR               | S186                | -0.96                          | 0.75                         |      |
| 499 | Rras2                | ras-related protein R-Ras2                                                              | NP_001013452     | KFQEQECPSS*PEPTRK              | S186                | -0.18                          | 0.20                         |      |
| 500 | Rtn4                 | reticulon-4                                                                             | NP_114019        | GPLPAAPPAAPERQPS*WER           | S107                | -1.05                          | 0.71                         |      |
| 501 | Rtn4                 | reticulon-4                                                                             | NP_114019        | LPAAPPAAPERQPS*WER             | S107                | 0.62                           | 0.65                         |      |
| 502 | Rtn4                 | reticulon-4                                                                             | NP_114019        | RRGS*GSVDLTFALPAASEPVPSSAEK    | S169^               | -1.33                          | 0.43                         |      |
| 503 | Rtn4                 | reticulon-4                                                                             | NP_114019        | RRGSGS*VDLTFALPAASEPVPSSAEK    | S171^               | 1.26                           | 0.97                         |      |
| 504 | Rtn4                 | reticulon-4                                                                             | NP_114019        | SKDKEDLVCSAALHS*PQESPVGK       | S329                | 4.81                           | 2.54                         |      |
| 505 | Sccpdh               | probable saccharopine dehydrogenase                                                     | NP_001014007     | SVS*NLKPVVIGSK                 | S217                | -0.42                          | 0.50                         |      |
| 506 | Scd1                 | sec1 family domain-containing protein 1                                                 | NP_062237        | VNLEESTGVENS*PTGARPK           | S298^               | 4.06                           | 4.14                         |      |
| 507 | Scrib                | PREDICTED: scribbled homolog isoform 5                                                  | XP_343267        | MQS*PELPAPER                   | S1483               | n/a                            | n/a                          |      |
| 508 | Scrib                | PREDICTED: scribbled homolog isoform 5                                                  | XP_343267        | MVEPENAVITITLPRPDDY*SPR        | Y818                | -0.41                          | 0.09                         | *    |
| 509 | Sec22b               | vesicle-trafficking protein SEC22b                                                      | NP_001020857     | NLGS*INTELQDVQR                | S137                | 4.74                           | 0.77                         | ‡    |
| 510 | Sec23ip              | SEC23-interacting protein                                                               | NP_001128331     | KLS*VGAYVSVR                   | S749                | -0.49                          | 0.09                         | *    |
| 511 | Sec61b               | protein transport protein Sec61 subunit beta                                            | NP_001100124     | PGPTPATNVGSSGRS*PSK            | S17                 | -1.09                          | 0.25                         | ‡    |
| 512 | Sec62                | translocation protein SEC62                                                             | NP_001029301     | ELEEQQT*DGDCDEDDDKDGMPEK       | T582                | n/a                            | n/a                          |      |
| 513 | Sept2                | septin-2                                                                                | NP_476489        | IYHLPDAES*DEDEDFKQETR          | S218                | -0.17                          | 0.20                         |      |

| #   | Gene Symbol | Protein Name                                                              | Refseq Accession | Peptide Sequence                    | Site(s)       | Log <sub>2</sub> (HV)<br>Mean | Log <sub>2</sub> (HV)<br>SE | Sig. |
|-----|-------------|---------------------------------------------------------------------------|------------------|-------------------------------------|---------------|-------------------------------|-----------------------------|------|
| 514 | Sep14       | septin 4                                                                  | NP_001011893     | IYQFFDCDS*DEDEDFKLDQALK             | S206          | n/a                           | n/a                         |      |
| 515 | Sfrs3       | splicing factor, arginine/serine-rich 3                                   | NP_001041372     | SLS*RRRR                            | S130^         | n/a                           | n/a                         |      |
| 516 | Sfrs6       | splicing factor, arginine/serine-rich 6                                   | NP_001014207     | SHS*PLPAPPSK                        | S303          | -1.08                         | 0.86                        |      |
| 517 | Sgta        | small glutamine-rich tetra-ricopeptide repeat-containing protein alpha    | NP_073194        | GPDRT*PPESEDESAEER                  | T81           | n/a                           | n/a                         |      |
| 518 | Sh3g2       | PREDICTED: endophilin-A1                                                  | XP_342858        | S*GVQMDQPCCR                        | S400          | n/a                           | n/a                         |      |
| 519 | Shank2      | SH3 and multiple ankyrin repeat domains protein 2 isoform c               | NP_597684        | RAPS*PVVS*PTELSK                    | S1119, S1123  | -0.21                         | 0.60                        |      |
| 520 | Shank2      | SH3 and multiple ankyrin repeat domains protein 2 isoform d               | NP_597685        | SNS*DNLNAGAPEWAVCSAATSHR            | S43^          | n/a                           | n/a                         |      |
| 521 | Slc12a1     | solute carrier family 12 member 1                                         | NP_062007        | KDS*NIHQSMHVGFEFNQK                 | S874          | 3.05                          | 0.71                        | *‡   |
| 522 | Slc12a1     | solute carrier family 12 member 1                                         | NP_062007        | TDTFHAYDSHT*NTYYLQTFGHNTMDAVPK      | T89^          | 1.31                          | 0.23                        | *‡   |
| 523 | Slc12a1     | solute carrier family 12 member 1                                         | NP_062007        | VNRPS*LOEIHQLAK                     | S126          | 5.90                          | 0.24                        | *‡   |
| 524 | Slc16a7     | monocarboxylate transporter 2                                             | NP_058998        | VSNTHNPPSDDRKDESS'I                 | S488          | n/a                           | n/a                         |      |
| 525 | Slc25a46    | solute carrier family 25 member 46                                        | NP_001093985     | SFGSGTELGHWVTT*PPDIPGSR             | T45           | 0.16                          | 0.13                        |      |
| 526 | Slc2a4      | solute carrier family 2, facilitated glucose transporter member 4         | NP_036883        | RTPS*LLEQEVKPESTEVLVGPDEND          | S488^         | 0.97                          | 0.22                        | *‡   |
| 527 | Slc43a2     | large neutral amino acids transporter small subunit 4                     | NP_001099282     | LCLST*TVDLEVK                       | S297          | -1.50                         | 0.16                        | *‡   |
| 528 | Slc43a2     | large neutral amino acids transporter small subunit 4                     | NP_001099282     | LCLST*VDLEVK                        | T298^         | n/a                           | n/a                         |      |
| 529 | Slc43a2     | large neutral amino acids transporter small subunit 4                     | NP_001099282     | REDS*KLFLK                          | S552          | 3.05                          | 3.00                        |      |
| 530 | Slc43a2     | large neutral amino acids transporter small subunit 4                     | NP_001099282     | RLS*VGSMMR                          | S274          | 0.88                          | 0.18                        | *‡   |
| 531 | Slc4a2      | anion exchange protein 2                                                  | NP_058744        | RRPGAS*PTGETPTIEEGEEDDEVGAEGR       | S113          | 0.21                          | 0.06                        |      |
| 532 | Slc4a2      | anion exchange protein 2                                                  | NP_058744        | RRPGASPT*GETPTIEEGEEDDEVGAEGR       | T115          | 0.24                          | 0.08                        |      |
| 533 | Slc4a2      | anion exchange protein 2                                                  | NP_058744        | TS*PSPPTQTPHQEAAPR                  | S171^         | 0.08                          | 0.17                        |      |
| 534 | Slc5a3      | solute carrier family 5 (inositol transporters), member 3                 | NP_446167        | EEGNPVASMGHSEAE*PVDAYSNGQAALMGER    | T626          | n/a                           | n/a                         |      |
| 535 | Slc9a1      | sodium/hydrogen exchanger 1                                               | NP_036784        | IGS*DPLAYEPK                        | S707          | 1.47                          | 1.66                        |      |
| 536 | Slc9a1      | sodium/hydrogen exchanger 1                                               | NP_036784        | SKEPSSPGTDVDFTPGSDS*PGSQR           | S790^         | n/a                           | n/a                         |      |
| 537 | Slc9a3      | sodium/hydrogen exchanger 3                                               | NP_036786        | RGS*LAFIR                           | S552          | 2.07                          | 0.30                        | *‡   |
| 538 | Slc9a3      | sodium/hydrogen exchanger 3                                               | NP_036786        | VQIPNS*PSNFR                        | S791          | -0.73                         | 0.32                        |      |
| 539 | Slc9a3r1    | Na(+)/H(+) exchange regulatory cofactor NHE-RF1                           | NP_067605        | EALVEPASES*PRPALAR                  | S277^         | -0.06                         | 0.22                        |      |
| 540 | Slc9a3r1    | Na(+)/H(+) exchange regulatory cofactor NHE-RF1                           | NP_067605        | SAS*SDTSEELNAQDPSK                  | S287          | n/a                           | n/a                         |      |
| 541 | Slc9a3r1    | Na(+)/H(+) exchange regulatory cofactor NHE-RF1                           | NP_067605        | SASS*DTSEELNAQDPSK                  | S288^         | n/a                           | n/a                         |      |
| 542 | Slc9a3r1    | Na(+)/H(+) exchange regulatory cofactor NHE-RF1                           | NP_067605        | SASSDT*SEELNAQDPSK                  | T290          | -0.20                         | 0.40                        |      |
| 543 | Sik         | STE20-like serine/threonine-protein kinase                                | NP_062222        | RDS*FIGTPYWMAPAEVMCETSK             | S189          | -0.91                         | 0.78                        |      |
| 544 | Smarca2     | probable global transcription activator SNF2L2                            | NP_001004446     | GRPPAEKLS*PNPKK                     | S1384         | -1.13                         | 0.43                        |      |
| 545 | Smpx        | small muscular protein                                                    | NP_445847        | RKES*TPGTAEGAPAT*PEEK               | S36, T47      | n/a                           | n/a                         |      |
| 546 | Smpx        | small muscular protein                                                    | NP_445847        | RKES*TPGTAEGAPAT*PEEK               | S36           | 4.47                          | 0.42                        | *‡   |
| 547 | Smpx        | small muscular protein                                                    | NP_445847        | RKESTPGT*AEGAPAT*PEEK               | T40           | 4.65                          | 0.74                        | *‡   |
| 548 | Snap23      | synaptosomal-associated protein 23                                        | NP_073180        | ATWGDGDDSS*PSNVVSK                  | S110          | 0.08                          | 0.26                        |      |
| 549 | Snb1        | beta-1-syntrophin                                                         | NP_001124014     | GSQGTGPGTGVQAPDS*PAGVR              | S88           | -0.34                         | 0.19                        |      |
| 550 | Snb2        | syntrophin, beta 2                                                        | NP_001162145     | GLGPPS*PPAPPR                       | S77           | 1.66                          | 1.74                        |      |
| 551 | Snb2        | syntrophin, beta 2                                                        | NP_001162145     | KPS*LVSDLPWEGASPOSPFSGSEDS*GSPK     | S190^, S213 ^ | n/a                           | n/a                         |      |
| 552 | Snb2        | syntrophin, beta 2                                                        | NP_001162145     | KPSLVSDLPWEGAS*POSFSGSEDS*GSPK      | S201^         | 0.45                          | 0.45                        |      |
| 553 | Snb2        | syntrophin, beta 2                                                        | NP_001162145     | KPSLVSDLPWEGASPOS*PSFSGSEDS*GSPK    | S204^, S215^  | n/a                           | n/a                         |      |
| 554 | Snb2        | syntrophin, beta 2                                                        | NP_001162145     | KPSLVSDLPWEGASPOS*PSFSGSEDS*GSPK    | S204          | 0.08                          | 0.11                        |      |
| 555 | Snb2        | syntrophin, beta 2                                                        | NP_001162145     | KPSLVSDLPWEGASPOS*PSFSGSEDS*GSPK    | S208^         | 0.08                          | 0.11                        |      |
| 556 | Snb2        | syntrophin, beta 2                                                        | NP_001162145     | KPSLVSDLPWEGASPOS*PSFSGSEDS*GSPK    | S215^         | 0.21                          | 0.09                        |      |
| 557 | Sort1       | sortilin precursor                                                        | NP_113955        | YS*VLQHAEDGV*EALDTASHAK             | S791          | 3.87                          | 0.46                        | *‡   |
| 558 | Sphk2       | sphingosine kinase 2                                                      | NP_001012066     | AKS*ELALAPAPAPA*HSLPHR              | S364, T377^   | n/a                           | n/a                         |      |
| 559 | Sphk2       | sphingosine kinase 2                                                      | NP_001012066     | AKS*ELALAPAPAPA*HSLPHR              | S364, S379^   | n/a                           | n/a                         |      |
| 560 | Spint2      | serine protease inhibitor, Kunitz type 2 isoform b                        | NP_954518        | NSCS*SFYGGCR                        | S100          | n/a                           | n/a                         |      |
| 561 | Spna2       | spectrin alpha chain, brain                                               | NP_741984        | WRS*LQQLAER                         | S1217         | -0.60                         | 0.26                        |      |
| 562 | Spp1        | osteopontin precursor                                                     | NP_037013        | ISHELESS*SEVN                       | S313          | 0.66                          | 0.80                        |      |
| 563 | Sptbn1      | spectrin beta chain, brain 1                                              | NP_001013148     | GDQVS*QNGLP*AEQGS*PR                | S2122         | 0.93                          | 0.83                        |      |
| 564 | Sptbn1      | spectrin beta chain, brain 1                                              | NP_001013148     | GDQVS*QNGLP*AEQGS*PR                | S2132         | 0.06                          | 0.33                        |      |
| 565 | Sptbn1      | spectrin beta chain, brain 1                                              | NP_001013148     | VSEEAESQQWDT*SKGDQVS*QNGLP*AEQGS*PR | S2122         | n/a                           | n/a                         |      |
| 566 | Sptbn1      | spectrin beta chain, brain 1                                              | NP_001013148     | VSEEAESQQWDT*SKGDQVS*QNGLP*AEQGS*PR | S2132         | n/a                           | n/a                         |      |
| 567 | Srrm1       | serine/arginine repetitive matrix protein 1                               | NP_001101456     | RRS*PS*PAPPPPPPPR                   | S558, S560    | n/a                           | n/a                         |      |
| 568 | Srrm1       | serine/arginine repetitive matrix protein 1                               | NP_001101456     | RYS*PPIQR                           | S601^         | 0.08                          | 0.18                        |      |
| 569 | Srrm2       | PREDICTED: serine/arginine repetitive matrix 2                            | XP_220207        | DKFS*PTQDRPESSTVLK                  | S1153         | 1.22                          | 1.39                        |      |
| 570 | Srrm2       | PREDICTED: serine/arginine repetitive matrix 2                            | XP_220207        | ELSHS*PPRDNFSFESLEFR                | S1280^        | -0.28                         | 0.41                        |      |
| 571 | Srrm2       | PREDICTED: serine/arginine repetitive matrix 2                            | XP_220207        | S*PVPSAFSDQSR                       | S2407         | n/a                           | n/a                         |      |
| 572 | Srrm2       | PREDICTED: serine/arginine repetitive matrix 2                            | XP_220207        | SSS*PVTLETAR                        | S1070         | 1.85                          | 1.67                        |      |
| 573 | Ssr1        | translocon-associated protein subunit alpha                               | NP_001008891     | VEMTSSNDVDM*WIPQET*LNQINKASPR       | T261^         | n/a                           | n/a                         |      |
| 574 | Ssrp1       | FACT complex subunit SSRP1                                                | NP_112383        | EGINPGYDDYADS*DEQHDAYLER            | S444          | n/a                           | n/a                         |      |
| 575 | St14        | matrilysin                                                                | NP_446087        | GGGS*QDFGAGLK                       | S13           | 3.73                          | 0.86                        | *‡   |
| 576 | Stat1       | signal transducer and activator of transcription 1 isoform alpha          | NP_116001        | LQSTENLLPMS*PEEFDMSK                | S727          | 1.60                          | 2.41                        |      |
| 577 | Stat3       | signal transducer and activator of transcription 3                        | NP_036879        | YCRPESQHEPADPGSAAPY*LK              | Y705          | -0.11                         | 0.09                        |      |
| 578 | Stk40       | serine/threonine-protein kinase 40                                        | NP_898879        | LSERET*VIFY*DVVR                    | Y179^         | n/a                           | n/a                         |      |
| 579 | Stx4        | syntaxin-4                                                                | NP_112387        | QGDNIS*DDDEVR                       | S15           | n/a                           | n/a                         |      |
| 580 | Stxbp5      | syntaxin-binding protein 5 isoform m                                      | NP_110470        | DPYRREPRS*PR                        | S685^         | n/a                           | n/a                         |      |
| 581 | Suv420h1    | histone-lysine N-methyltransferase SUV420H1                               | NP_001101982     | DSIDIDIS*RRR                        | S871^         | n/a                           | n/a                         |      |
| 582 | Tacc2       | transforming acidic coiled coil 2 isoform 1                               | NP_001004415     | LDNTPAS*PPRS*PAEPSDPIAK             | S2207, S2211  | n/a                           | n/a                         |      |
| 583 | Tceb3       | transcription elongation factor B polypeptide 3                           | NP_058799        | S*PEMDQEPVISHPKPKG                  | S195          | 0.07                          | 0.19                        |      |
| 584 | Tcfap2d     | transcription factor AP-2-delta                                           | NP_001100365     | QHMEQKEQT*ARKK                      | T166          | n/a                           | n/a                         |      |
| 585 | Tgfb11      | PREDICTED: transforming growth factor beta-1-induced transcript 1 protein | XP_341935        | VQNHLPASGPPQPAV*PTR                 | S186^         | n/a                           | n/a                         |      |



| #   | Gene Symbol | Protein Name                                                                      | Refseq Accession | Peptide Sequence                  | Site(s)                   | Log <sub>2</sub> (H/V)<br>Mean | Log <sub>2</sub> (H/V)<br>SE | Sig. |
|-----|-------------|-----------------------------------------------------------------------------------|------------------|-----------------------------------|---------------------------|--------------------------------|------------------------------|------|
| 586 | Tgfb11      | PREDICTED: transforming growth factor beta-1-induced transcript 1 protein         | XP_341935        | VQNHLPASGGPPQAVSPT*R              | T188                      | n/a                            | n/a                          |      |
| 587 | Tgoln1      | trans-Golgi network integral membrane protein TGN38 precursor                     | NP_620195        | VLGPSS*SENGEQLTDSMKDEK            | S271^                     | 0.76                           | 0.98                         |      |
| 588 | Thoc2       | PREDICTED: THO complex 2                                                          | XP_233081        | GGEKPPVSGSLKS*PVPR                | S1393                     | 0.54                           | 0.44                         |      |
| 589 | Thrap3      | thyroid hormone receptor-associated protein 3                                     | NP_001009693     | ERS*PALKS*PLQSVVVR                | S248, S253                | 0.25                           | 0.59                         |      |
| 590 | Thrap3      | thyroid hormone receptor-associated protein 3                                     | NP_001009693     | IDIS*PSTFR                        | S679                      | -0.03                          | 0.07                         |      |
| 591 | Tjp1        | tight junction protein ZO-1                                                       | NP_001099736     | AVPVS*PSAVEEDEDGHTVVATAR          | S1602                     | -0.08                          | 0.13                         |      |
| 592 | Tjp1        | tight junction protein ZO-1                                                       | NP_001099736     | FNHLLPSETVHKPELS*SKPPSPK          | S1549^                    | 0.63                           | 1.24                         |      |
| 593 | Tjp1        | tight junction protein ZO-1                                                       | NP_001099736     | FNHLLPSETVHKPELSKPPSPK            | S1555                     | 1.38                           | 1.90                         |      |
| 594 | Tjp1        | tight junction protein ZO-1                                                       | NP_001099736     | MSKPGAVS*TPVKHVDHTPK              | S341^                     | -0.58                          | 0.54                         |      |
| 595 | Tjp1        | tight junction protein ZO-1                                                       | NP_001099736     | S*REDLSAQPVQTK                    | S605                      | n/a                            | n/a                          |      |
| 596 | Tjp1        | tight junction protein ZO-1                                                       | NP_001099736     | SREDS*AOVPQTK                     | S610                      | -0.08                          | 0.10                         |      |
| 597 | Tjp2        | tight junction protein ZO-2                                                       | NP_446225        | KVQVAPLQGS*PPLSHDDR               | S107                      | -0.62                          | 0.13                         | *‡   |
| 598 | Tjp3        | tight junction protein ZO-3                                                       | NP_001101543     | AIAPES*PGEGR                      | S348                      | n/a                            | n/a                          |      |
| 599 | Tmem139     | PREDICTED: transmembrane protein 139-like                                         | XP_002726399     | VVST*APDLQSLR                     | T171                      | 0.32                           | 1.11                         |      |
| 600 | Tmem143     | transmembrane protein 143                                                         | NP_001100983     | VWLVLPALLGT*PRALSS*LENRMGAY*R     | T37^, S43^, Y51^          | -1.18                          | 3.35                         |      |
| 601 | Tmpo        | lamina-associated polypeptide 2, isoform beta                                     | NP_037019        | QNGSNDSDRY*DNDESKIELK             | S183^                     | n/a                            | n/a                          |      |
| 602 | Tmpo        | lamina-associated polypeptide 2, isoform beta                                     | NP_037019        | SST*PLPTVSSAENR                   | T159                      | 0.26                           | 0.14                         |      |
| 603 | Tmx1        | thioredoxin-related transmembrane protein 1                                       | NP_001019971     | KVEEQEADEEDV*EEETENR              | S245                      | n/a                            | n/a                          |      |
| 604 | Tmx1        | thioredoxin-related transmembrane protein 1                                       | NP_001019971     | VEEQEADEEDV*EEETENR               | S245                      | n/a                            | n/a                          |      |
| 605 | Tnks1bp1    | PREDICTED: tankyrase 1 binding protein 1                                          | XP_215763        | RAS*VSTNQNTDENDQELR               | S883                      | n/a                            | n/a                          |      |
| 606 | Tnks1bp1    | PREDICTED: tankyrase 1 binding protein 1                                          | XP_215763        | RFS*EGVLRPPSODQEK                 | S423                      | 0.54                           | 0.65                         |      |
| 607 | Tnks1bp1    | PREDICTED: tankyrase 1 binding protein 1                                          | XP_215763        | S*SGSLSPGLETDPLEAR                | S1355^                    | n/a                            | n/a                          |      |
| 608 | Tnks1bp1    | PREDICTED: tankyrase 1 binding protein 1                                          | XP_215763        | SSGSL*PGLTDPLEAR                  | S1360                     | n/a                            | n/a                          |      |
| 609 | Tns1        | PREDICTED: tensin 1                                                               | XP_237286        | AINPTMAAPGSPSL*HR                 | S1467                     | -2.04                          | 0.06                         | *‡   |
| 610 | Tns1        | PREDICTED: tensin 1                                                               | XP_237286        | ET*TSRTPEEPLNLEGLVAHR             | T1108                     | 0.04                           | 0.04                         |      |
| 611 | Tns1        | PREDICTED: tensin 1                                                               | XP_237286        | ETTSRT*PEEPLNLEGLVAHR             | T1115                     | 0.01                           | 0.07                         |      |
| 612 | Tns1        | PREDICTED: tensin 1                                                               | XP_237286        | HLGGSGSVPGS*PSLDR                 | S1568                     | -0.86                          | 0.15                         | *‡   |
| 613 | Tns1        | PREDICTED: tensin 1                                                               | XP_237286        | HLGGSGSVPGS*LDR                   | S1570^                    | -1.15                          | 0.12                         |      |
| 614 | Tns1        | PREDICTED: tensin 1                                                               | XP_237286        | HPVQSHQVPLHSGVVTTPGS*PSLGR        | S1523                     | -2.02                          | 0.28                         | *‡   |
| 615 | Tns1        | PREDICTED: tensin 1                                                               | XP_237286        | HVAYGGYST*PEDR                    | T1582                     | -0.98                          | 0.12                         | *‡   |
| 616 | Tns1        | PREDICTED: tensin 1                                                               | XP_237286        | KKDS*LNSSGPIITAR                  | S628                      | 1.17                           | 0.25                         | *‡   |
| 617 | Tns1        | PREDICTED: tensin 1                                                               | XP_237286        | MAAPGS*PSLSHR                     | S1463^                    | n/a                            | n/a                          |      |
| 618 | Tns1        | PREDICTED: tensin 1                                                               | XP_237286        | QVMGSPGPGFHGNVSGHPTSATVAPGS*PSLGR | S1497^                    | -2.34                          | 0.28                         | *‡   |
| 619 | Tns1        | PREDICTED: tensin 1                                                               | XP_237286        | S*QSPDVEPOLQAPAR                  | S873^                     | 0.26                           | 0.17                         |      |
| 620 | Tns1        | PREDICTED: tensin 1                                                               | XP_237286        | SQS*FPDVEPOLQAPAR                 | S875                      | 0.70                           | 0.59                         |      |
| 621 | Tns1        | PREDICTED: tensin 1                                                               | XP_237286        | SYS*PYDQLHPAASNGSFRPK             | S1052                     | n/a                            | n/a                          |      |
| 622 | Tns1        | PREDICTED: tensin 1                                                               | XP_237286        | T*PEEPLNLEGLVAHR                  | T1115                     | n/a                            | n/a                          |      |
| 623 | Tns1        | PREDICTED: tensin 1                                                               | XP_237286        | TVGTNTPPS*PGFGR                   | S1446                     | -0.68                          | 0.16                         | *‡   |
| 624 | Tns1        | PREDICTED: tensin 1                                                               | XP_237286        | VGSHQVPLHSGVVTTPGS*PSLGR          | S1523                     | -2.89                          | 0.60                         | *‡   |
| 625 | Tns1        | PREDICTED: tensin 1                                                               | XP_237286        | WDS*YDNFNHGR                      | S592                      | 1.88                           | 1.49                         |      |
| 626 | Tomm34      | mitochondrial import receptor subunit TOM34                                       | NP_001037709     | NRVPS*AGDVER                      | S186                      | -0.38                          | 0.20                         |      |
| 627 | Tomm70a     | mitochondrial import receptor subunit TOM70                                       | NP_997684        | AS*PALGSGPDGSGDSLEMSLDR           | S94                       | n/a                            | n/a                          |      |
| 628 | Tor1aip1    | torsin-1A-interacting protein 1                                                   | NP_659560        | LEOHSQQAQQQLS*PATSGR              | S142                      | -3.11                          | 2.63                         |      |
| 629 | Tpr         | translocated promoter region                                                      | NP_001100655     | TDGFAEIH*POVAVVPR                 | S2152                     | -0.30                          | 0.16                         |      |
| 630 | Tra2a       | transformer-2 protein homolog alpha                                               | NP_001119768     | HT*PTPIYMGRR                      | T200                      | 0.00                           | 0.04                         |      |
| 631 | Trim23      | GTP-binding protein ARD-1                                                         | NP_001094107     | MEIRVVT*LLDGGAGK                  | T409                      | n/a                            | n/a                          |      |
| 632 | Trim28      | transcription intermediary factor 1-beta                                          | NP_446368        | SRS*GEGEVGLMR                     | S474                      | 1.02                           | 1.61                         |      |
| 633 | Ttn         | PREDICTED: titin                                                                  | XP_001065955     | DT*STT*AWQIVSAT*VAR               | T22251^, T22254^, T22262^ | n/a                            | n/a                          |      |
| 634 | U2af2       | PREDICTED: U2 small nuclear ribonucleoprotein auxiliary factor (U2AF) 2 isoform 6 | XP_001060115     | NRDORSAS*RRRRR                    | S55^                      | 1.57                           | 3.18                         |      |
| 635 | Ubxn4       | UBX domain-containing protein 4                                                   | NP_001012025     | NTELCET*PTTSDPK                   | T156                      | n/a                            | n/a                          |      |
| 636 | Ugdh        | UDP-glucose 6-dehydrogenase                                                       | NP_112615        | RIPYT*PGEIPK                      | T474                      | -0.27                          | 0.12                         |      |
| 637 | Uhrf1       | E3 ubiquitin-protein ligase UHRF1                                                 | NP_001008882     | KS*TPGATT*SPR                     | S696^, T697^, T702^       | n/a                            | n/a                          |      |
| 638 | Utrn        | utrophin                                                                          | NP_037202        | NVRPQPPT*SPGGR                    | T1404                     | 0.48                           | 0.78                         |      |
| 639 | Utrn        | utrophin                                                                          | NP_037202        | NVRPQPPTS*PEGRR                   | S1405                     | -0.49                          | 0.28                         |      |
| 640 | Vcl         | vinculin                                                                          | NP_001100718     | S*LLDASEEAIKK                     | S721                      | -0.49                          | 0.11                         | *    |
| 641 | Wbp11       | WW domain-binding protein 11                                                      | NP_001009661     | RRDEDMLYS*PELAQR                  | S237                      | -0.28                          | 0.19                         |      |
| 642 | Wdr20a      | WD repeat domain 20a                                                              | NP_001094364     | RNS*TDSRPVSVTYR                   | S357                      | -2.83                          | 1.99                         |      |
| 643 | Wdr20a      | WD repeat domain 20a                                                              | NP_001094364     | SNS*LPHSAVSNAGSK                  | S434                      | -0.82                          | 2.15                         |      |
| 644 | Wdr20a      | WD repeat domain 20a                                                              | NP_001094364     | SNSLPHS*AVSNAGSK                  | S438^                     | 1.62                           | 1.25                         |      |
| 645 | Xpo1        | exportin-1                                                                        | NP_445942        | EKVY*IGK                          | Y126                      | n/a                            | n/a                          |      |
| 646 | Zc3h18      | zinc finger CCH domain-containing protein 18                                      | NP_958819        | VQSQEEIHS*DEEDQASEPK              | S63                       | n/a                            | n/a                          |      |
| 647 | Zdhhc5      | probable palmitoyltransferase ZDHHC5                                              | NP_001034427     | GDS*LKEPTSIADSSR                  | S380                      | 1.03                           | 1.35                         |      |
| 648 | Zfp64       | zinc finger protein 64                                                            | NP_001012093     | THMR                              | T192                      | -2.28                          | 1.65                         |      |
| 649 | Zfr         | PREDICTED: zinc finger RNA-binding protein                                        | XP_345170        | RRDS*DGVDGFEAEKG                  | S1027                     | n/a                            | n/a                          |      |
| 650 | Znf574      | zinc finger protein 574                                                           | NP_001019429     | KS*HVRNHLR                        | S509                      | n/a                            | n/a                          |      |
| 651 | Zranb2      | zinc finger Ran-binding domain-containing protein 2                               | NP_113804        | ENVEIEREES*DGEYDEFGR              | S120^                     | n/a                            | n/a                          |      |
| 652 | Zranb2      | zinc finger Ran-binding domain-containing protein 2                               | NP_113804        | EVEDKES*EGEEDEDEDLSK              | S153                      | n/a                            | n/a                          |      |
| 653 | Zranb2      | zinc finger Ran-binding domain-containing protein 2                               | NP_113804        | YNLDAS*EEEDSNK                    | S188                      | n/a                            | n/a                          |      |
| 654 | Zyx         | zyxin                                                                             | NP_446213        | S*PGGGLTLK                        | S336                      | -0.30                          | 0.21                         |      |
